1 **The type IVa pilus machinery is pre-installed during cell division**

2

3 Tyson Carter<sup>1</sup>, Ryan N.C. Buensuceso<sup>1</sup>, Stephanie Tammam<sup>2</sup>, Ryan P. Lamers<sup>1</sup>,

4 Hanjeong Harvey<sup>1</sup>, P. Lynne Howell<sup>2,3#</sup>, and Lori L. Burrows<sup>1#</sup>.

5

6 <sup>1</sup>Department of Biochemistry and Biomedical Sciences and the Michael G. DeGroote

7 Institute for Infectious Disease Research, McMaster University, ON, CANADA;

8 <sup>2</sup>Program in Molecular Structure & Function, The Hospital for Sick Children; and

9 <sup>3</sup>Department of Biochemistry, University of Toronto, ON, CANADA.

10

11 **Running title:** Pre-installation of the type IV pilus machinery

12

13 **#To whom correspondence should be addressed:**

14 Dr. Lori L. Burrows, 4H18 Health Sciences Centre, 1200 Main St. West, Hamilton, ON,

15 L8N 3Z5 CANADA, Tel: (905)-525-9140 ext: 22029, Fax: (905) 522-9033, E-mail:

16 burrowl@mcmaster.ca

17 Dr. P. Lynne Howell, 20-9-715 Peter Giligan Centre for Research and Learning, 686 Bay

18 St., Toronto, ON M5G 0A4 CANADA, Tel: (416) 813-5378, Fax: (416) 813-5022, E-mail:

19 howell@sickkids.ca

20

21

22

23

24 **ABSTRACT**

25 Type IV pili (T4aP) are ubiquitous microbial appendages used for adherence, twitching  
26 motility, DNA uptake, and electron transfer. Many of these functions depend on dynamic  
27 assembly and disassembly of the pilus by a megadalton-sized, cell envelope-spanning  
28 protein complex located at the poles of rod-shaped bacteria. How the T4aP assembly  
29 complex becomes integrated into the cell envelope in the absence of dedicated  
30 peptidoglycan (PG) hydrolases is unknown. After ruling out potential involvement of  
31 housekeeping PG hydrolases in installation of the T4aP machinery in *P. aeruginosa*, we  
32 discovered that key components of inner (PilMNOP) and outer (PilQ) membrane  
33 subcomplexes are recruited to future sites of cell division. Mid-cell recruitment of a  
34 fluorescently tagged alignment subcomplex component, mCherry-PilO, depended on  
35 PilQ secretin monomers - specifically, their N-terminal PG-binding AMIN domains. PilP,  
36 which connects PilO to PilQ, was required for recruitment, while PilM, which is  
37 structurally similar to divisome component FtsA, was not. Recruitment preceded secretin  
38 oligomerization in the outer membrane, as loss of the PilQ pilotin, PilF, had no effect on  
39 localization. These results were confirmed in cells chemically blocked for cell division  
40 prior to outer membrane invagination. The hub protein FimV and a component of the  
41 Polar Organelle Coordinator complex - PocA - were independently required for mid-cell  
42 recruitment of PilO and PilQ. Together, these data reveal an integrated, energy-efficient  
43 strategy for the targeting and pre-installation – rather than retrofit - of the T4aP system  
44 into nascent poles, without the need for dedicated PG-remodelling enzymes.

45

46

47 **IMPORTANCE**

48           The peptidoglycan (PG) layer of bacterial cell envelopes has limited porosity,  
49 representing a physical barrier to insertion of large protein complexes involved in  
50 secretion and motility. Many systems include dedicated PG hydrolase components that  
51 create space for their insertion, but the ubiquitous type IVa pilus (T4aP) system lacks  
52 such an enzyme. Instead, we found that components of the T4aP system are recruited  
53 to future sites of cell division where they can be incorporated into the cell envelope  
54 during the formation of new poles, eliminating the need for PG hydrolases. Targeting  
55 depends on the presence of septal PG-binding motifs in specific components, as  
56 removal of those motifs causes delocalization. This pre-installation strategy for the T4aP  
57 assembly system ensures that both daughter cells are poised to extrude pili from new  
58 poles as soon as they separate from one another.

59

60 **INTRODUCTION**

61           The cell envelopes of most gram-negative bacteria are comprised of an inner  
62 membrane, a peptidoglycan (PG) layer found in the periplasm, and an outer membrane  
63 (OM). A variety of large protein complexes, including motility machines, secretion  
64 systems, and efflux pumps span all these layers (1), but in many cases the mechanisms  
65 used to integrate these systems into the cell envelope remain uncharacterized. In many  
66 cases, they are integrated at specific locations in the cell such as the poles, which is  
67 important for their function.

68           The machinery that assembles and disassembles type IVa pili (T4aP) is among  
69 the most common cell envelope-spanning complexes found in gram-negative bacteria.

70 T4aP are long, thin protein fibres used for adherence, biofilm formation and a flagellum-  
71 independent form of motility known as twitching, defined as repeated cycles of pilus  
72 extension, adherence to a surface, and retraction of the pilus fibre (2, 3). *P. aeruginosa*  
73 T4aP are important for surface mechanosensing and consequent up-regulation of  
74 virulence factor expression (4), and for the delivery of toxins by other secretion systems  
75 (5, 6). In the absence of T4aP, *P. aeruginosa* has reduced pathogenicity (5).

76 The T4aP machinery is composed of four subcomplexes that together form a  
77 dynamic cylindrical machine (3, 7, 8). The inner membrane motor and alignment  
78 subcomplexes form the platform for assembly and disassembly of the pilus, and interact  
79 directly with the secretin that allows for pilus extrusion through the OM. The OM  
80 lipoprotein PilF promotes formation of the secretin, a highly stable oligomer of 14 PilQ  
81 subunits that form a gated channel in the OM (9, 10). The N-terminus of each PilQ  
82 monomer contains two tandem amidase N-terminal (AMIN) domains, involved in binding  
83 peptidoglycan (11-13). The alignment subcomplex composed of PilMNOP connects the  
84 motor subcomplex with the secretin, and participates in pilus extension and retraction  
85 (14-17). PilM is a cytoplasmic, actin-like protein that clamps tightly onto the short amino-  
86 terminus of the inner membrane protein, PilN, which in turn forms heterodimers with  
87 inner membrane protein, PilO (14, 18, 19). The inner membrane lipoprotein PilP  
88 interacts with PilNO heterodimers via its long unstructured N-terminus, and with the  
89 periplasmic N0 domain of PilQ via its C-terminal homology region (HR) domain,  
90 completing the transenvelope complex (17, 20).

91 T4aP are usually located at the poles of rod-shaped cells, which promotes  
92 adherence by minimizing surface area and thus electrostatic repulsion (3). How the

93 multi-protein T4aP system is initially targeted to and integrated into the poles of *P.*  
94 *aeruginosa* cells are not well understood. Type III (T3SS) and Type IV (T4SS) secretion  
95 systems have dedicated PG-remodelling enzymes that allow for retrofitting of the  
96 complexes into the cell envelope (1). There are no such enzymes associated with the  
97 T4aP system, suggesting that it uses an alternate pathway for cell envelope integration.  
98 Here we used fluorescent fusions to an informative alignment subcomplex component,  
99 PilO, and to the secretin monomer, PilQ, to track and quantify their localization in *P.*  
100 *aeruginosa* wild type and mutant backgrounds. The results show that PilO and  
101 associated components are recruited to future sites of cell division by the concerted  
102 action of at least three pathways. We propose that the T4aP machinery is preinstalled  
103 during formation of nascent cell poles, a strategy that eliminates the need for dedicated  
104 cell-wall-processing enzymes.

105

## 106 **RESULTS**

### 107 **mCherry-PilO localizes to cell poles and future cell division sites**

108 When selecting components of the T4aP machinery to track using fluorescent  
109 fusions, we considered the known interactions and stoichiometry of these proteins and  
110 how a fusion might affect function. PilM is cytoplasmic, but has multiple interaction  
111 partners (14, 19, 20), including PilN, whose cytoplasmic N-terminus binds to a groove on  
112 PilM; thus, we excluded both as candidates. PilN interacts along most of its remaining  
113 length with PilO (15, 21), but PilO's cytoplasmic N-terminus is poorly conserved among  
114 T4aP-expressing species (16), supporting the observation that it appears to have no  
115 cytoplasmic interaction partners. Therefore, PilO was selected as a fusion candidate for

116 localization of the alignment subcomplex. To maintain the physiological expression  
117 levels and stoichiometry that are important for function (14), a *pilO* construct encoding  
118 an in-frame fusion of mCherry to the N-terminus of PilO was used to replace the WT  
119 version at the native *pilO* locus (**Fig. 1A**). Stability and functionality of the fusion protein  
120 were verified by western blot with anti-PilO and anti-mCherry antisera, and assessment  
121 of twitching motility, respectively (**Fig. 1B**).

122 mCherry-PilO localized to both poles, as well as to the midpoint of cells  
123 undergoing division (**Fig. 1C**). To more clearly visualize the predivisional localization  
124 pattern of mCherry-PilO, cells were treated with sub-inhibitory levels of cefsulodin, which  
125 inhibits PBP3 (FtsI), a late-stage PG transpeptidase, leading to division arrest and  
126 filamentation (22). In filamented cells, mCherry-PilO localized to the poles and to  
127 regularly spaced foci, suggestive of recruitment to future sites of cell division (**Fig. 1D**).  
128 Quantification of mCherry-PilO localization in wild type cells (**Fig. 1E**) confirmed its  
129 predominately bipolar localization.

130 To provide further evidence that mCherry-PilO was recruited to sites of cell  
131 division, the *minC* gene, which encodes a key component of the oscillating Min system  
132 required for inhibition of FtsZ polymerization at non-mid-cell locations (23, 24) was  
133 deleted in the mCherry-PilO strain. Cells lacking MinC exhibit aberrantly localized septa,  
134 producing mini-cells due to unequal cell division (**Fig. 2A**). As predicted, the mCherry-  
135 PilO fusion continued to localize to polar and septal sites despite their aberrant  
136 placement (**Fig. 2B**). Together, these data suggest that when expressed under  
137 physiological conditions, PilO – and by inference, its interaction partners, PilMN and PilP  
138 (20) – are recruited to future sites of cell division.

139

140 **PilQ monomers are required for T4aP alignment subcomplex localization**

141 To define the mechanism of recruitment of the T4aP alignment subcomplex to  
142 sites of cell division, we first examined the effects of deleting specific subcomplex  
143 components. The cytoplasmic member of the alignment subcomplex, PilM, has  
144 pronounced structural similarity ( $C\alpha$  root mean square deviation = 1.9 Å over 257  
145 residues) to the early divisome protein, FtsA, a peripheral inner membrane protein  
146 whose interaction with FtsZ tethers the latter to the membrane (18, 19). Based on its  
147 structural mimicry of FtsA and its peripheral membrane localization via binding of PilN's  
148 amino terminus, we previously hypothesized (25) that PilM – and thus the alignment  
149 subcomplex – might be recruited to mid-cell through interactions with the FtsZ ring.  
150 However, mCherry-PilO exhibited polar and mid-cell localization in a *pilM* mutant (**Fig.**  
151 **3AB**), ruling out PilM as a driver of recruitment.

152 The PilMNOP alignment subcomplex connects to the secretin via interaction of  
153 the C-terminal HR domain of PilP with the periplasmic N0 domain of PilQ (20).  
154 Preceding the N0 domain in *P. aeruginosa* PilQ are two tandem AMIN domains,  
155 predicted to bind septal PG (11-13). To test their PG-binding ability, we cloned,  
156 expressed, and purified 3 fragments of PilQ's N-terminal region (the AMIN domains  
157 alone; the N0-N1 domains alone; and all 4 domains together), and performed pulldown  
158 assays using purified *P. aeruginosa* PG (**Supplementary Fig. S1**). In the absence of  
159 PG, all fragments remained in the soluble fraction; however, when insoluble PG was  
160 present, only those fragments containing the AMIN domains were also found in the  
161 insoluble fraction, indicating that they bind PG.

162           Since *pilMNOPQ* are expressed from a single operon, we hypothesized that  
163 recruitment of PilMNOP to sites of cell division might occur through a series of PilMNOP-  
164 PilQ-septal PG interactions. We first confirmed that PilQ-mCherry was localized to the  
165 poles and to regularly spaced foci in filamented cells, a pattern similar to mCherry-PilO  
166 (**Supplementary Fig. S2**). When we deleted *pilQ*, mCherry-PilO became delocalized  
167 (**Fig. 3CD**). To confirm that loss of mCherry-PilO localization in the *pilQ* strain was  
168 indirectly due to loss of PilP-PilQ interactions, *pilP* was deleted in the mCherry-PilO  
169 strain. In the *pilP* mutant, mCherry-PilO was delocalized (**Fig. 3EF**), supporting the  
170 hypothesis that recruitment of PilQ to mid-cell is the primary event, and the remaining  
171 alignment subcomplex components are recruited via their interaction with PilP, and its  
172 interaction with PilQ.

173           To test whether its AMIN domains were responsible for localization of PilQ and its  
174 interaction partners to mid-cell and polar positions, we complemented a *pilQ* mutant  
175 expressing mCherry-PilO with full length *pilQ*, or a construct expressing only the N0-N1  
176 and secretin domains, previously shown to form stable but non-functional secretin  
177 oligomers (**Fig. 4A**) (9). Full length PilQ restored the wild type pattern of mCherry-PilO  
178 localization (**Fig. 4BC**), but the AMIN-deficient PilQ did not (**Fig. 4DE**). These data show  
179 that localization of T4aP assembly components is dependent upon PilQ's AMIN  
180 domains, which interact with PG (**Supplementary Fig. S1**).

181

## 182 **Localization of mCherry-PilO precedes PilQ oligomerization**

183           The *Myxococcus xanthus* T4aP system was proposed to assemble in an 'outside-  
184 in' manner, with PilMNOP alignment subcomplexes docking onto the PilQ secretin after



185 its assembly in the OM (26). Those data are not consistent with our observation that  
186 mCherry-PilO localized to regularly spaced foci in chemically-filamented *P. aeruginosa*  
187 cells (**Fig. 1**), where the OM is not yet invaginated due to arrest of cell division. To test  
188 whether secretin oligomerization was a necessary prerequisite for recruitment, we  
189 examined localization of PilQ-mCherry in mutants lacking the OM lipoprotein PilF. In the  
190 absence of PilF, PilQ remains in a monomeric state in the inner membrane (9), but its  
191 localization pattern was unchanged compared to wild type (**Supplementary Fig. S2AB**).  
192 Similarly, localization of mCherry-PilO in the *pilF* background resembled wild type (**Fig.**  
193 **5**). These data confirm that localization of T4aP components to mid-cell – while PilQ-  
194 dependent – precedes secretin oligomerization.

195

#### 196 **Additional factors modulate T4aP assembly machinery localization**

197 FimV is a T4aP-associated protein required for twitching motility and has a highly  
198 conserved PG-binding LysM motif in its periplasmic N-terminal domain (27, 28). We  
199 showed previously (28) that PilQ multimer formation is reduced in a *fimV* mutant, which  
200 made FimV of interest for this study. In the absence of FimV, mCherry-PilO was  
201 delocalized (**Fig. 6AB**), as was PilQ-mCherry (**Supplementary Fig. S2C**). We  
202 previously generated a strain expressing a variant of FimV with an in-frame deletion of  
203 its LysM motif (28). mCherry-PilO (**Fig. 6CD**) was delocalized in the *fimV*<sub>ΔLysM</sub> strain, as  
204 was the majority of PilQ-mCherry (**Supplementary Fig. S2D**). These data suggest that  
205 interactions of both PilQ and FimV with PG are important steps in the localization  
206 process, and that polar localization of PilQ depends in part on FimV.

207           During a mutant screen looking for factors required for correct localization of *P.*  
208 *aeruginosa*'s single polar flagellum, Cowles and colleagues (29) identified a putative  
209 protein complex that they named PocAB -TonB3 for 'polar organelle coordinator'. Loss  
210 of TonB3 had previously been shown to affect twitching motility (30), but the mechanism  
211 was unknown. All three components were required for expression and/or polar  
212 localization of T4aP. *pocA* mutants made a few, non-polar pili, while *pocB* and *tonB3*  
213 mutants failed to produce pili. The mechanism by which this system controls polar  
214 localization of motility organelles remains unclear, since the Poc proteins themselves  
215 are not localized to the poles (29).

216           We focused on *pocA* as the mutant's ability to make a few pili suggested that the  
217 T4aP assembly system was functional, and deleted it from cells expressing either  
218 mCherry-PilO (**Fig. 7AB**) or PilQ-mCherry (**Supplementary Fig. S2E**). mCherry-PilO  
219 was delocalized in the absence of *pocA*, and its wild type localization was re-established  
220 upon complementation with *pocA in trans* (**Fig. 7CD**). PilQ-mCherry was delocalized in  
221 the *pocA* background although some polar fluorescence remained (**Supplementary Fig.**  
222 **S2E**). Interestingly, while both PocA and FimV were required for T4P assembly  
223 component localization to polar and midcell locations, they appear to act independently  
224 of one another. The fluorescent FimV fusion, which exhibits bipolar localization in wild  
225 type cells, remained localized to the poles of a *pocA* mutant (**Fig. 8**).

226

## 227 **DISCUSSION**

228           The T4aP machinery spans all layers of the gram-negative cell envelope at the  
229 poles of rod-shaped cells, but how this megadalton protein complex is installed in the

230 absence of dedicated PG hydrolyzing enzymes was unclear. Here we showed that  
231 degradation of PG is unnecessary, because components of the *P. aeruginosa* T4P  
232 alignment subcomplex and the secretin are recruited to sites of cell division where they  
233 can be pre-installed, rather than retrofitted, into nascent poles. These data are  
234 consistent with our observation that mutants lacking multiple housekeeping PG  
235 hydrolases – which could potentially provide PG lytic activities for retrofitting in the  
236 absence of system-specific enzymes – have correctly inserted, functional T4aP  
237 machines, as demonstrated by their ability to twitch (**Supplementary Fig. S3**). Instead,  
238 at least 3 different mechanisms participate in the process of T4aP polar localization in *P.*  
239 *aeruginosa*, two of which (PilQ and FimV) depend on recognition of PG, as deletion of  
240 PilQ's AMIN domains or FimV's LysM motif results in delocalization.

241 Cell poles are characterized by PG that has fewer stem peptides compared to  
242 lateral wall PG, due to the activity of *N*-acetylmuramyl-L-alanine amidases that cleave  
243 the amide bond between *N*-acetylmuramic acid and the stem peptides during daughter  
244 cell separation (31-33). This denuded form of PG is the binding target for multiple  
245 protein motifs, among them AMIN, SPOR, and LysM (28, 34-36). *P. aeruginosa* and *M.*  
246 *xanthus* PilQ monomers have N-terminal AMIN domains (2 per monomer in *P.*  
247 *aeruginosa* and 3 in *M. xanthus*), which in addition to targeting (37), may anchor secretin  
248 complexes to the PG layer to counter the substantial forces generated during twitching  
249 motility. *Neisseria gonorrhoeae* and *N. meningitidis* PilQ monomers also contain 2 AMIN  
250 domains at their amino termini (11), yet they express peritrichous T4aP. *Neisseria* spp.  
251 lack the cytoskeletal element MreB which patterns elongation of rod-shaped bacteria  
252 (38), thus have a coccoid morphology. It's possible that the mechanism of T4aP

253 assembly system recruitment to sites of cell division is similar in *Neisseria* spp., but due  
254 to their shape – the equivalent of two closely apposed poles – they appear to have  
255 peritrichous T4aP distribution.

256 In the *P. aeruginosa* T4aP system, at least two different PG-binding proteins were  
257 needed for correct positioning. We showed previously (28) that FimV binds PG via its  
258 LysM motif, important for optimal secretin assembly. A number of recent studies showed  
259 that FimV and related HubP proteins – which contain multiple protein-protein interaction  
260 domains in addition to conserved LysM motifs – act as landmarks, responsible for polar  
261 localization of other proteins, including those involved in regulation of T4aP function,  
262 flagellar placement, and chromosome segregation (39-43). For example, *P. aeruginosa*  
263 FimL – a regulatory protein important for T4aP assembly via its regulation of intracellular  
264 cAMP levels – interacts with the C-terminal TPR motif of FimV (39, 44). Loss of FimV  
265 also results in mislocalization of the core T4aP machinery (**Fig. 6**); thus FimV appears to  
266 have both physical and regulatory roles in T4aP assembly and function.

267 Cowles *et al.* (29) reported that both the flagellum and T4aP were mislocalized in  
268 *P. aeruginosa* mutants lacking the polar organelle coordinating (Poc) proteins, but the  
269 mechanism remains enigmatic. The T4aP alignment subcomplex was delocalized in a  
270 *pocA* mutant (**Fig. 7**) while FimV remained bipolar (**Fig. 8**), implying that they act  
271 independently of one another – with the caveat that the FimV fusion used here was non-  
272 functional in twitching motility. PocAB-TonB3 are homologous to the ExbBD-TonB  
273 complex in *E. coli* (29) which energizes siderophore uptake across the OM via direct  
274 interactions with the ‘Ton box’ on one beta strand of TonB-dependent receptors. The NO  
275 domains of secretin monomers are structurally similar (2.3 Å root mean square deviation

276 over 65 residues) to the signalling domain of FpvA, a TonB-dependent siderophore  
277 receptor in *P. aeruginosa* (45). This similarity hints at potential interactions between the  
278 TonB3 component of the Poc complex and the N0 domain of PilQ monomers. We noted  
279 that although deletion of *pocA* had no significant effect on cell morphology,  
280 complementation with a plasmid-borne copy of the gene increased average cell length  
281 by ~50% (**Supplementary Fig. S4**), suggesting that the Poc system might influence the  
282 timing of cell division or affect PG remodelling. Subtle structural differences in PG  
283 architecture in the absence of PocA could impact binding of proteins with PG targeting  
284 motifs.

285 Mid-cell recruitment of mCherry-PilO was dependent on the secretin monomer  
286 PilQ (**Fig. 3CD**) but deletion of the pilotin PilF had no effect (**Fig. 5**), showing that  
287 recruitment and confinement of PilMNOPQ to cell division sites occur prior to secretin  
288 oligomerization. Prior studies of *M. xanthus* T4aP assembly system formation suggested  
289 that PilQ multimerization was essential for the recruitment of additional T4aP assembly  
290 components, because loss of Tgl – the *M. xanthus* PilF homolog – abrogated polar  
291 localization of PilQ and other T4aP proteins. These data supported an ‘outside in’ model  
292 for *M. xanthus* T4aP system formation, dependent on PilQ oligomerization (26).  
293 Interestingly, *M. xanthus* PilQ was suggested in that study to localize to the septum  
294 either “late during cell division, or immediately after”. These data are consistent with the  
295 pattern of PilQ localization in *P. aeruginosa*: however, the pilotin proteins in *M. xanthus*  
296 and *P. aeruginosa* appear to play somewhat different roles.

297 Together, the data led us to propose a pathway for T4aP assembly machinery  
298 integration into the *P. aeruginosa* cell envelope in the absence of dedicated PG

299 hydrolases. We suggest that PilMNOPQ are co-translated, forming an IM-bound  
300 subcomplex that diffuses laterally until the AMIN domains of PilQ monomers bind to  
301 septal PG. FimV, which has the capacity to interact with septal PG via its Lys motif, may  
302 also interact with components of the subcomplex to retain them at cell division sites. The  
303 next steps are still unclear, as the oligomerization pathway for PilQ in the OM remains  
304 unknown. We previously proposed (9) that co-translocation of the lipoprotein PilF and  
305 PilQ monomers by the Lol system might promote PilQ insertion into the OM, where it  
306 oligomerizes. In this new model, we suggest that PilF is translocated independently by  
307 the Lol system to the OM, where it then scans for, binds to, and promotes translocation  
308 of PilQ monomers from the inner to the OM during invagination in the final stages of cell  
309 division.

310         Two lines of evidence support this new hypothesis. First, in *M. xanthus*, co-  
311 incubation of *pilQ* and *tgl* (*pilF*) mutants, neither of which are able to twitch, allowed for  
312 intercellular transfer of Tgl from the *pilQ* mutant to the *tgl* mutant and oligomerization of  
313 the latter's PilQ monomers, restoring piliation and motility (46). Thus, Tgl already  
314 present in the OM of the *pilQ* mutant could promote insertion and oligomerization of PilQ  
315 monomers in the *tgl* mutant. Second, the ability of OM lipoproteins to interact with inner  
316 membrane proteins across the periplasm is now well established, as exemplified by the  
317 *E. coli* OM lipoproteins, LpoA and LpoB (47, 48). These proteins are essential for  
318 stimulating the activities of the inner membrane PG synthases PBP1a and PBP1b,  
319 respectively, through direct interactions with regulatory domains of those enzymes.  
320 Once PilQ monomers reach the OM with the assistance of PilF, they may first form  
321 conformational intermediates prior to maturation into stable, SDS-resistant oligomers. In

322 *N. gonorrhoeae*, certain point mutations in the secretin domain were associated with  
323 formation of immature, leaky oligomers, rendering the cells more susceptible to beta  
324 lactam antibiotics (49).

325         The above scenario for PilQ translocation suggests that the ~ 2 nm porosity of  
326 PG (50) would not pose a physical barrier to secretin assembly, as individual monomers  
327 (~77 kDa) are small enough to pass through its natural gaps. Retention of PilQ AMIN  
328 interactions with septal PG during translocation and insertion of the C-terminal secretin  
329 domain in the OM would ultimately place the AMIN domains 'under' the PG layer, where  
330 they would be ideally positioned to counteract retraction forces imposed during twitching  
331 motility. Because polar PG is less likely to be remodelled due to its limited side chain  
332 content, the secretin would remain stably fixed to the cell wall. Studies of the half-life of  
333 a single bacterial cell pole show that it can be hundreds of generations old (51); thus, it  
334 is perhaps not surprising that secretin complexes are highly resistant to denaturation,  
335 allowing them to last as long as the poles in which they are embedded.

336         Among the questions remaining is whether the interaction interface between PilP  
337 and PilQ is altered during translocation of PilQ monomers to the OM. We established  
338 that mid-cell localization of mCherry-PilO depends on PilP (**Fig. 3EF**), which interacts  
339 with the N0 domain of PilQ monomers via its C-terminal HR domain (11, 20). PilP also  
340 interacts with PilNO heterodimers via its long unstructured N-terminus (17). This flexible  
341 tether might allow the C-terminal domain of PilP to remain connected to the N0 domain  
342 of PilQ as secretin monomers transit from the inner to OM. Alternatively, PilP may be  
343 repositioned relative to PilQ when the latter translocates to the OM. In the evolutionarily  
344 related T2SS, multiple interaction interfaces between the HR domain of GspC (PilP) and

345 N0 of GspD (PilQ) have been identified through a combination of structural, biochemical,  
346 and functional studies (45, 52, 53). These various interfaces – some of which are  
347 mutually exclusive – were attributed to differences in experimental setup, but could also  
348 reflect capture of different interaction states pre- and post-secretin oligomerization.  
349 Studies to address these possibilities are currently underway.

350

## 351 **MATERIALS & METHODS**

### 352 **Strains, media and growth conditions**

353 Bacterial strains, plasmids, and primers used in this study are listed in Tables 1  
354 and 2. *Escherichia coli* and *P. aeruginosa* were grown at 37°C in LB Lennox broth or on  
355 LB 1.5% agar plates supplemented with antibiotics. The antibiotics and their respective  
356 concentrations were: ampicillin (Ap), 100 µg/mL; carbenicillin (Cb), 200 µg/mL;  
357 gentamicin (Gm), 15 µg/mL for *E. coli* strain and 30 µg/mL for *P. aeruginosa* strains,  
358 unless otherwise stated. Plasmids were transformed by heat shock into chemically  
359 competent *E. coli* cells or by electroporation into *P. aeruginosa* suspended in sterile  
360 water. All constructs were verified by DNA sequencing (MOBIX Lab, McMaster  
361 University).

362

### 363 **Generation of *P. aeruginosa* mutants**

364 Mutants were made using previously described methods (54). Deletion constructs  
365 for generation of *minC* and *pilF* mutants were designed to include 500 nucleotides up  
366 and downstream of the gene to be deleted, as well as the first and last 50 nucleotides of  
367 the gene. Constructs were synthesized and cloned into pUC57 (Genscript, Piscataway,



368 NJ). Deletion inserts in pUC57 were subcloned into the pEX18Gm suicide vector (55)  
369 using the 5' BamHI and the 3' HindIII restriction sites, and verified by DNA sequencing.  
370 After verification, suicide vectors containing the mutant genes (*pilF* or *minC*) were  
371 transformed into *E. coli* SM10 cells. Plasmids were then transferred by conjugation in a  
372 1:9 ratio of *P. aeruginosa* to *E. coli*. The mixed culture was pelleted for 1 min at 2292 x  
373 g, and the pellet was resuspended in a 100  $\mu$ L aliquot of LB, spot-plated on LB agar,  
374 and incubated overnight at 37 °C. The mating mixture was removed from the LB agar  
375 using a sterile toothpick, resuspended in 1 mL of LB and the *E. coli* SM10 donor was  
376 counterselected by plating the mixture on *Pseudomonas* isolation agar (PIA; Difco)  
377 containing Gm (100  $\mu$ g/ml). Gm-resistant *P. aeruginosa* colonies were streaked on LB  
378 no salt plates containing sucrose (1% (w/v) bacto-tryptone, 5% (w/v) sucrose, 1.5%  
379 agar, 0.5% (w/v) bacto-yeast extract) and incubated for 16 h at 30 °C. Select colonies  
380 were then subcultured on LB agar and LB agar plus Gm, and Gm-sensitive colonies  
381 were screened by PCR using appropriate primers (Table 2) to confirm integration.  
382 Amplicons from colonies with the desired PCR profile were sequenced to confirm  
383 incorporation of the mutation, and the *pilF* mutant was analyzed by western blot analysis  
384 using an  $\alpha$ -PilF antibody to verify loss of the gene product.

385 A *pilQ* KO construct containing an FRT-flanked Gm cassette was designed  
386 previously (9). This construct was integrated into the PAK chromosome using a Flp-FRT  
387 recombination system (55) and selected for using the methods described above with the  
388 following modifications: following growth on sucrose, colonies were cultured on LB agar,  
389 LB agar with Gm and LB agar plus Cb. Colonies that had undergone double  
390 recombination, integrating *pilQ::GmFRT* into the chromosome without pEX18Ap (Cb

391 sensitive colonies), were selected. The Gm cassette was removed by Flp recombinase-  
392 catalyzed excision, by conjugally transferring the Flp-expressing pFLP2 from SM10 cells  
393 into PAK cells carrying the GmFRT-disrupted *pilQ* gene. SM10 cells were  
394 counterselected on PIA containing Cb (200 µg/ml). pFLP2 was removed from *P.*  
395 *aeruginosa* by streaking Cb-resistant colonies on LB agar, no salt, containing 5% (w/v)  
396 sucrose for 16 h at 30 °C. Colonies were then cultured on LB agar and LB-agar  
397 containing Gm or Cb. Cb and Gm sensitive colonies were screened by PCR using the  
398 PilQ FRT-Chk primers listed in Table 2 to confirm the retention of the FRT scar. The *pilQ*  
399 gene of mutant strains were sequenced to confirm correct incorporation of the mutation,  
400 and analyzed by western blot with  $\alpha$ -PilQ sera to confirm loss of the gene product.

401 The *pocA* deletion construct was created previously in the pEX18Tc suicide  
402 vector (29). The *pocA* deletion insert was subcloned into pEX18Gm using EcoRI and  
403 XbaI, and constructs verified by DNA sequencing. After verification, the suicide vector  
404 containing the *pocA* deletion construct transformed into *E. coli* SM10 cells and the  
405 mutation introduced into *P. aeruginosa* as described above.

406

#### 407 **Generation of a chromosomally encoded mCherry-PilO fusion**

408 A construct encoding an fusion of mCherry (56) to the N-terminus of PilO, plus  
409 700 nucleotides upstream of *pilO* and 700 nucleotides downstream of *pilO*, was  
410 synthesized and cloned into pUC57 (Genscript, Piscataway, NJ). The mCherry-PilO-  
411 encoding insert was subcloned into the suicide vector pEX18Gm using the 5' EcoRI and  
412 the 3' HindIII restriction sites, constructs verified by DNA sequencing, and introduced  
413 into chemically competent *E. coli* SM10 by heat shock. The plasmid was then

414 transferred by conjugation in a 1:9 ratio of *P. aeruginosa* (wild type or various T4aP  
415 mutants) to *E. coli* as described above. Following counter selection and curing of  
416 merodiploids by sucrose selection, integration of the mCherry-PilO fusion in Gm-  
417 sensitive colonies was confirmed by PCR and DNA sequencing (Table 2). mCherry-PilO  
418 expressing strains were analyzed using western blot analysis and twitching assays to  
419 verify expression of an intact fluorescent fusion protein and – in the wild type – function  
420 of the T4aP machinery, respectively.

421

### 422 **Generation of complementation constructs**

423 The *pilQ*, *pocA* and *pilF* genes were amplified by PCR using PAK chromosomal  
424 DNA as the template (Table 2) and cloned into pBADGr (Table 1). The digested DNA  
425 was purified and ligated into pBADGr with T4 DNA ligase, according to the  
426 manufacturer's instructions. Ligation mixtures were then transformed into *E. coli* DH5 $\alpha$   
427 cells and grown overnight at 37 °C on LB agar supplemented with the appropriate  
428 antibiotics.

429 A construct encoding a truncated version of PilQ lacking its AMIN domains was  
430 previously generated in the PAO1 strain (9). The same boundaries were used here to  
431 generate a truncated version of PAK PilQ. The PilQ Clone Fwd and PilQ 5' Rev primers  
432 were used to amplify the 5' end of the gene, excluding the first AMIN domain, and the  
433 PilQ N0 Fwd and PilQ Clone Rev primers (Table 2) were used to amplify the remainder  
434 of the gene beginning at the N0 domain and excluding the second AMIN domain.  
435 Purified amplicons were digested with XbaI and ligated into pBADGr with T4 DNA  
436 Ligase. The ligation product and pBADGr were then digested with EcoRI and HindIII and

437 ligated following the same protocol. The fidelity of the pBADGr-*pilQ* construct was  
438 confirmed by sequencing using the pBADGr mcs Fwd and Rev primers (Table 2).

439         Since PilQ has a cleavable N-terminal signal sequence, and a C-terminus that is  
440 exposed to the extracellular environment (9, 57), we designed a construct encoding an  
441 internal fusion of mCherry to PilQ (between the first and second AMIN domains,  
442 residues 132 and 133), which was synthesized and subcloned into pUC57 (Genscript).  
443 The PilQ-mCherry-encoding insert was subcloned into the complementation vector  
444 pBADGr (58) using the 5' EcoRI and the 3' HindIII restriction sites and verified by DNA  
445 sequencing. The construct was then introduced into PAK *pilQ::FRT* cells by  
446 electroporation. Expression of the PilQ-mCherry fusion was verified using western blot  
447 analysis with  $\alpha$ -PilQ and  $\alpha$ -mCherry antibodies and function was verified using twitching  
448 assays (59).

449         The *yfp* gene encoding Yellow Fluorescent Protein (YFP) was cloned into the  
450 HindIII restriction site of pBADGr. Correct insertion of the pBADGr-*yfp* construct was  
451 confirmed by DNA sequencing using mcs Fwd/Rev primers (Table 2). A version of *fimV*  
452 lacking its stop codon was amplified using the FimV Clone Fwd/Rev primers (Table 2)  
453 and cloned into pBADGr in frame with the *yfp* gene by digesting both the vector and  
454 insert with KpnI and XbaI restriction enzymes and ligating with T4 DNA ligase.  
455 Successful ligation of the insert was confirmed using the pBADGr multiple cloning site  
456 flanking primers (Table 2) and DNA sequencing. The construct was then electroporated  
457 into  $\Delta$ *fimV* and  $\Delta$ *pocA* cells. A stable fusion of YFP to the C-terminus of FimV was  
458 confirmed by western blotting with  $\alpha$ -AFP and  $\alpha$ -FimV antibodies. This fusion is  
459 considered non-functional as it failed to restore twitching in the *fimV* background.

## 460 **Twitching motility assays**

461 Twitching motility assays were performed as previously described (59). Single  
462 colonies were stab inoculated to the bottom of a 1% LB agar plate. Plates were  
463 incubated for 24 h at 30 °C. Following incubation, the agar was removed and the  
464 adherent bacteria stained with 1% (w/v) crystal violet for 30 min, followed by washing  
465 with water to remove unbound dye. Twitching zones were photographed and their areas  
466 measured using Fiji (60). All experiments were performed in triplicate with at least three  
467 independent replicates.

468

## 469 **Analysis of whole cell lysates by western blot**

470 Cultures were grown overnight at 37 °C in LB supplemented with appropriate  
471 antibiotics and diluted to an OD<sub>600</sub> of 0.6. A 1 mL aliquot of cells was collected by  
472 centrifugation at 2292 x g for 1 min. and the cell pellet was resuspended in 100 µl of  
473 SDS sample buffer (80 mM Tris (pH 6.8), 5.3% (v/v) 2- mercaptoethanol, 10% (v/v)  
474 glycerol, and 0.02% (w/v) bromophenol blue, and 2% (w/v) SDS) and boiled for 10 min.

475 Equal volumes of whole cell lysates were separated by 12.5% SDS-PAGE at 80-  
476 150 V and transferred to nitrocellulose membranes for 1 h at 225 mA. Membranes were  
477 blocked using 5% (w/v) low fat skim milk powder in phosphate buffered saline solution  
478 (PBS) at pH 7.4 for 1 h at room temperature, followed by incubation with the appropriate  
479 polyclonal (for PilF, PilM, PilO, PilP, PilQ, FimV) or monoclonal (for mCherry) antisera  
480 for 1 h at room temperature. Membranes were washed twice in 10 mL of PBS for 5 min  
481 then incubated in either goat-anti-rabbit or goat-anti-mouse IgG-alkaline phosphatase  
482 conjugated secondary antibody (Bio-Rad) at a dilution of 1:3000 for 1 h at room

483 temperature. Membranes were washed twice in PBS for 5 min, and developed in a  
484 solution containing 100  $\mu$ L nitro-blue tetrazolium (NBT) and 100  $\mu$ L 5-bromo-4-chloro-3-  
485 indolyl phosphate (BCIP) in 10 mL of alkaline phosphatase buffer (100 mM NaCl, 5 mM  
486  $MgCl_2$ , 100 mM Tris, pH 9.5).

487

### 488 **Cell preparation for transmission electron microscopy**

489 Cells from a 1 mL overnight culture in LB were pelleted at 2292 x *g* and  
490 resuspended in a 1 mL solution of 2% (w/v) gluteraldehyde in 0.1M sodium cacodylate  
491 buffer at a pH of 7.4. Cells were fixed in solution for 2 h at 4 °C, and washed twice with  
492 cold sodium cacodylate buffer (pH 7.4). Samples were then treated with 1% osmium  
493 tetroxide in 0.1M sodium cacodylate for 1 h and stained with 2% uranyl acetate  
494 overnight. After staining, cells were dehydrated gradually with ethanol, treated with  
495 propylene oxide, embedded in Spurr's resin, and polymerized at 60 °C overnight. The  
496 polymerized samples were sectioned using a Leica UCT ultramicrotome and post-  
497 stained with 2% uranyl acetate and lead citrate. The prepared specimens were  
498 examined in McMaster University's Electron Microscopy Facility using the JEOL JEM  
499 1200 EX TEMSCAN microscope (JEOL, Peabody, MA, USA) operating at an  
500 accelerating voltage of 80kV. Images were acquired with an AMT 4-megapixel digital  
501 camera (Advanced Microscopy Techniques, Woburn, MA).

502

### 503 **Fluorescence Microscopy**

504 Strains were incubated overnight at 37 °C in 5 mL of LB supplemented with the  
505 appropriate antibiotics. One mL of cells were pelleted at 2292 x *g*, and resuspended in 1

506 mL of sterile water containing 10 µg/ml of either Fm1-43 Fx (for cells expressing  
507 mCherry) or Fm1-64 Fx (for cells expressing YFP) membrane stain (Invitrogen). Cells  
508 were mixed with dye by gentle pipetting, and pelleted at 2292 x g. Pelleted cells were  
509 then stab-inoculated using a pipette tip to the coverslip-media interface at the bottom of  
510 an 8-well microscope glass-coverslip slide containing 200 µl 1% LB agarose per well  
511 (Lab-Tek). Cells were then incubated for 75 min at 37 °C prior to imaging. In  
512 filamentation experiments, 1 mL of cells grown overnight were sub-cultured into 4 mL of  
513 LB containing 40 µg/ml of cefsulodin and incubated for 3 h at 37 °C. Cells were then  
514 stained and mounted for microscopy using the above protocol. Cells were imaged using  
515 an EVOS FI-auto microscope in the McMaster Biophotonics Facility. Images were  
516 acquired using a 60x oil immersion objective using a Texas Red filter, YFP filter, or  
517 transmitted white light (no filter). Fiji (60) was used to adjust image brightness and  
518 contrast, and to overlay brightfield and fluorescent images.

519

## 520 **Quantification of mCherry-PilO fluorescence**

521 Fluorescence was quantified using Fiji software (60). Each field in the Texas Red  
522 (for mCherry) and YFP (for Fm1-43 Fx) filter sets were overlaid, and used with the  
523 micrograph from the YFP filter for image analysis. A 250 µm<sup>2</sup> grid was added to each  
524 field for precise documentation of the quantified cells. Moving systematically between  
525 squares in the grid, cells that fulfilled the following criteria were selected: 1) not  
526 contacting other cells; 2) normal rod morphology; and 3) a stable mCherry-PilO fusion  
527 (diffuse cytoplasmic fluorescence implies cleavage of the tag in that cell). Cell lengths  
528 and pixel intensities were measured from one cell pole to the other and normalized to 1

529 (i.e., each data point associated with length divided by the total length of the cell to yield  
530 normalized 0 to 1 scale). Pixel intensity measurements in the YFP field (cell outline)  
531 were then subtracted from the overlay field, producing mCherry-PilO pixel intensity  
532 measurements alone in each cell on a scale from 0 to 1. From the data, an XY scatter  
533 plot was generated to show the distribution of mCherry-PilO fluorescence over cell  
534 length.

535

### 536 **ACKNOWLEDGEMENTS**

537 We thank Dr. Zemer Gitai for the *pocA* deletion construct, and Dr. Ray Truant and  
538 McMaster Biophotonics for access to the EVOS microscope, and the McMaster Electron  
539 Microscopy facility for assistance with TEM.

540

### 541 **REFERENCES**

- 542 1. **Scheurwater EM, Burrows LL.** 2011. Maintaining network security: how  
543 macromolecular structures cross the peptidoglycan layer. *FEMS Microbiology*  
544 *Letters* **318**:1-9.
- 545 2. **Mattick JS.** 2002. Type IV Pili and Twitching Motility. *Annual Review of*  
546 *Microbiology* **56**:289-314.
- 547 3. **Burrows LL.** 2012. *Pseudomonas aeruginosa* Twitching Motility: Type IV Pili in  
548 Action. *Annual Review of Microbiology* **66**:493-520.
- 549 4. **Siryaporn A, Kuchma SL, O'Toole GA, Gitai Z.** 2014. Surface attachment  
550 induces *Pseudomonas aeruginosa* virulence. *Proc Natl Acad Sci U S A*  
551 **111**:16860-16865.



- 552 5. **Heiniger RW, Winther-Larsen HC, Pickles RJ, Koomey M, Wolfgang MC.**  
553 2010. Infection of human mucosal tissue by *Pseudomonas aeruginosa* requires  
554 sequential and mutually dependent virulence factors and a novel pilus-associated  
555 adhesin. *Cellular Microbiology* **12**:1158-1173.
- 556 6. **Golovkine G, Faudry E, Bouillot S, Elsen S, Attree I, Huber P.** 2016.  
557 *Pseudomonas aeruginosa* Transmigrates at Epithelial Cell-Cell Junctions,  
558 Exploiting Sites of Cell Division and Senescent Cell Extrusion. *PLoS Pathog*  
559 **12**:e1005377.
- 560 7. **Chang YW, Rettberg LA, Treuner-Lange A, Iwasa J, Sogaard-Andersen L,**  
561 **Jensen GJ.** 2016. Architecture of the type IVa pilus machine. *Science*  
562 **351**:aad2001.
- 563 8. **Gold VA, Salzer R, Averhoff B, Kuhlbrandt W.** 2015. Structure of a type IV  
564 pilus machinery in the open and closed state. *Elife* **4**.
- 565 9. **Koo J, Tang T, Harvey H, Tammam S, Sampaleanu L, Burrows LL, Howell**  
566 **PL.** 2013. Functional Mapping of PilF and PilQ in the *Pseudomonas aeruginosa*  
567 Type IV Pilus System. *Biochemistry* **52**:2914-2923.
- 568 10. **Koo J, Lamers RP, Rubinstein JL, Burrows LL, Howell PL.** 2016. Structure of  
569 the *Pseudomonas aeruginosa* Type IVa Pilus Secretin at 7.4 Å. *Structure*  
570 **24**:1778-1787.
- 571 11. **Berry JL, Phelan MM, Collins RF, Adomavicius T, Tonjum T, Frye SA, Bird L,**  
572 **Owens R, Ford RC, Lian LY, Derrick JP.** 2012. Structure and assembly of a  
573 trans-periplasmic channel for type IV pili in *Neisseria meningitidis*. *PLoS Pathog*  
574 **8**:e1002923.

- 575 12. **Leighton TL, Buensuceso RNC, Howell PL, Burrows LL.** 2015. Biogenesis of  
576 *Pseudomonas aeruginosa* type IV pili and regulation of their function.  
577 Environmental Microbiology **17**:4148-4163.
- 578 13. **Rocaboy M, Herman R, Sauvage E, Remaut H, Moonens K, Terrak M,**  
579 **Charlier P, Kerff F.** 2013. The crystal structure of the cell division amidase AmiC  
580 reveals the fold of the AMIN domain, a new peptidoglycan binding domain.  
581 Molecular Microbiology **90**:267-277.
- 582 14. **Ayers M, Sampaleanu LM, Tammam S, Koo J, Harvey H, Howell PL, Burrows**  
583 **LL.** 2009. PilM/N/O/P Proteins Form an Inner Membrane Complex That Affects  
584 the Stability of the *Pseudomonas aeruginosa* Type IV Pilus Secretin. J Mol Biol  
585 **394**:128-142.
- 586 15. **Leighton TL, Dayalani N, Sampaleanu LM, Howell PL, Burrows LL.** 2015.  
587 Novel Role for PilNO in Type IV Pilus Retraction Revealed by Alignment  
588 Subcomplex Mutations. J Bacteriol **197**:2229-2238.
- 589 16. **Sampaleanu LM, Bonanno JB, Ayers M, Koo J, Tammam S, Burley SK, Almo**  
590 **SC, Burrows LL, Howell PL.** 2009. Periplasmic Domains of *Pseudomonas*  
591 *aeruginosa* PilN and PilO Form a Stable Heterodimeric Complex. J Mol Biol  
592 **394**:143-159.
- 593 17. **Tammam S, Sampaleanu LM, Koo J, Sundaram P, Ayers M, Chong AP,**  
594 **Forman-Kay JD, Burrows LL, Howell PL.** 2011. Characterization of the PilN,  
595 PilO and PilP type IVa pilus subcomplex. Molecular Microbiology **82**:1496-1514.

- 596 18. **Karuppiah V, Derrick JP.** 2011. Structure of the PilM-PilN inner membrane type  
597 IV pilus biogenesis complex from *Thermus thermophilus*. J Biol Chem  
598 **286**:24434-24442.
- 599 19. **McCallum M, Tammam S, Little DJ, Robinson H, Koo J, Shah M, Calmettes**  
600 **C, Moraes TF, Burrows LL, Howell PL.** 2016. PilN binding modulates the  
601 structure and binding partners of the *Pseudomonas aeruginosa* Type IVa Pilus  
602 protein PilM. J Biol Chem **291**:11003-11015.
- 603 20. **Tammam S, Sampaleanu LM, Koo J, Manoharan K, Daubaras M, Burrows**  
604 **LL, Howell PL.** 2013. PilMNOPQ from the *Pseudomonas aeruginosa* type IV  
605 pilus system form a transenvelope protein interaction network that interacts with  
606 PilA. J Bacteriol **195**:2126-2135.
- 607 21. **Leighton TL, Yong DH, Howell PL, Burrows LL.** 2016. Type IV Pilus Alignment  
608 Subcomplex Components PilN and PilO Form Homo- and Heterodimers In Vivo.  
609 J Biol Chem doi:10.1074/jbc.M116.738377.
- 610 22. **Gotoh N, Nunomura K, Nishino T.** 1990. Resistance of *Pseudomonas*  
611 *aeruginosa* to cefsulodin: modification of penicillin-binding protein 3 and mapping  
612 of its chromosomal gene. J Antimicrob Chemo **25**:513-523.
- 613 23. **Davis BM, Waldor MK.** 2013. Establishing polar identity in gram-negative rods.  
614 Curr Opin Microbiol **16**:752-759.
- 615 24. **Hu Z, Mukherjee A, Pichoff S, Lutkenhaus J.** 1999. The MinC component of  
616 the division site selection system in *Escherichia coli* interacts with FtsZ to prevent  
617 polymerization. PNAS **96**:14819-14824.

- 618 25. **Burrows LL.** 2013. A new route for polar navigation. *Molecular Microbiology*  
619 **90**:919-922.
- 620 26. **Friedrich C, Bulyha I, Sogaard Andersen L.** 2014. Outside-in assembly  
621 pathway of the type IV pilus system in *Myxococcus xanthus*. *J Bacteriol* **196**:378-  
622 390.
- 623 27. **Semmler ABT, Whitchurch CB, Leech AJ, Mattick JS.** 2000. Identification of a  
624 novel gene, *fimV*, involved in twitching motility in *Pseudomonas aeruginosa*.  
625 *Microbiology* **146**:1321-1332.
- 626 28. **Wehbi H, Portillo E, Harvey H, Shimkoff AE, Scheurwater EM, Howell PL,**  
627 **Burrows LL.** 2011. The peptidoglycan-binding protein FimV promotes assembly  
628 of the *Pseudomonas aeruginosa* type IV pilus secretin. *J Bacteriol* **193**:540-550.
- 629 29. **Cowles KN, Moser TS, Siryaporn A, Nyakudarika N, Dixon W, Turner JJ,**  
630 **Gitai Z.** 2013. The putative Poc complex controls two distinct *Pseudomonas*  
631 *aeruginosa* polar motility mechanisms. *Molecular Microbiology* **90**:923-938.
- 632 30. **Huang B, Ru K, Yuan Z, Whitchurch CB, Mattick JS.** 2004. tonB3 is required  
633 for normal twitching motility and extracellular assembly of type IV pili. *J Bacteriol*  
634 **186**:4387-4389.
- 635 31. **Bernhardt TG, De Boer PAJ.** 2003. The *Escherichia coli* amidase AmiC is a  
636 periplasmic septal ring component exported via the twin-arginine transport  
637 pathway. *Molecular Microbiology* **48**:1171-1182.
- 638 32. **Heidrich C, Templin MF, Ursinus A, Merdanovic M, Berger J, Schwarz H, de**  
639 **Pedro MA, Holtje J-V.** 2001. Involvement of N-acetylmuramyl-L-alanine

- 640           amidases in cell separation and antibiotic induced autolysis of *Escherichia coli*.  
641           Molecular Microbiology **41**:167-178.
- 642   33.   **Peters NT, Dinh T, Bernhardt TG.** 2011. A fail-safe mechanism in the septal ring  
643           assembly pathway generated by the sequential recruitment of cell separation  
644           amidases and their activators. J Bacteriol **193**:4973-4983.
- 645   34.   **Buist G, Steen A, Kok J, Kuipers OP.** 2008. LysM, a widely distributed protein  
646           motif for binding to (peptido)glycans. Molecular Microbiology **68**:838-847.
- 647   35.   **Duncan TR, Yahashiri A, Arends SJR, Popham DL, Weiss DS.** 2013.  
648           Identification of SPOR domain amino acids important for septal localization,  
649           peptidoglycan binding, and a disulfide bond in the cell division protein FtsN. J  
650           Bacteriology **195**:5308-5315.
- 651   36.   **Mesnage Sep, Dellarole M, Baxter NJ, Rouget J-B, Dimitrov JD, Wang N,**  
652           **Fujimoto Y, Hounslow AM, Lacroix-Desmazes Seb, Fukase K, Foster SJ,**  
653           **Williamson MP.** 2014. Molecular basis for bacterial peptidoglycan recognition by  
654           LysM domains. Nat Communications **5**:1-11.
- 655   37.   **de Souza RF, Anantharaman V, de Souza SJ, Aravind L, Gueiros-Filho FJ.**  
656           2008. AMIN domains have a predicted role in localization of diverse periplasmic  
657           protein complexes. Bioinformatics **24**:2423-2426.
- 658   38.   **Ramirez-Arcos S, Szeto J, Beveridge T, Victor C, Francis F, Dillon J.** 2001.  
659           Deletion of the cell-division inhibitor MinC results in lysis of *Neisseria*  
660           *gonorrhoeae*. Microbiology **147**:225-237.
- 661   39.   **Buensuceso RNC, Nguyen Y, Zhang K, Daniel-Ivad M, Sugiman-Marangos**  
662           **SN, Fleetwood AD, Zhulin IB, Junop MS, Howell PL, Burrows LL.** 2016. The

- 663 conserved TPR-containing C-terminal domain of *Pseudomonas aeruginosa* FimV  
664 is required for its cAMP-dependent and independent functions. J Bacteriol  
665 **198**:2263-2274.
- 666 40. **Kirkpatrick CL, Viollier PH.** 2012. Cell polarity: ParA-logs gather around the  
667 Hub. Curr Biol **22**:R1055-1057.
- 668 41. **Rossmann F, Brenzinger S, Knauer C, Dorrich AK, Bubendorfer S, Ruppert**  
669 **U, Bange G, Thormann KM.** 2015. The role of FlhF and HubP as polar landmark  
670 proteins in *Shewanella putrefaciens* CN-32. Mol Microbiol **98**:727-742.
- 671 42. **Takekawa N, Kwon S, Nishioka N, Kojima S, Homma M.** 2016. HubP, a polar  
672 landmark protein, regulates flagellar number by assisting in the proper polar  
673 localization of FlhG in *Vibrio alginolyticus*. J Bacteriol doi:10.1128/JB.00462-16.
- 674 43. **Yamaichi Y, Bruckner R, Ringgaard S, Moll A, Cameron DE, Briegel A,**  
675 **Jensen GJ, Davis BM, Waldor MK.** 2012. A multidomain hub anchors the  
676 chromosome segregation and chemotactic machinery to the bacterial pole.  
677 Genes Dev **26**:2348-2360.
- 678 44. **Inclan YF, Persat A, Greninger A, Von Dollen J, Johnson J, Krogan N, Gitai**  
679 **Z, Engel JN.** 2016. A scaffold protein connects type IV pili with the Chp  
680 chemosensory system to mediate activation of virulence signaling in  
681 *Pseudomonas aeruginosa*. Mol Microbiol **101**:590-605.
- 682 45. **Korotkov KV, Pardon E, Steyaert J, Hol WG.** 2009. Crystal structure of the N-  
683 terminal domain of the secretin GspD from ETEC determined with the assistance  
684 of a nanobody. Structure **17**:255-265.

- 685 46. **Nudleman E, Wall D, Kaiser D.** 2005. Cell-to-cell Transfer of Bacterial Outer  
686 Membrane Lipoproteins. *Science* **309**:125-127.
- 687 47. **Typas A, Banzhaf M, van den Berg van Saparoea B, Verheul J, Biboy J,**  
688 **Nichols RJ, Zietek M, Beilharz K, Kannenberg K, von Rechenberg M,**  
689 **Breukink E, den Blaauwen T, Gross CA, Vollmer W.** 2010. Regulation of  
690 peptidoglycan synthesis by outer-membrane proteins. *Cell* **143**:1097-1109.
- 691 48. **Jean NL, Bougault CM, Lodge A, Derouaux A, Callens G, Egan AJ, Ayala I,**  
692 **Lewis RJ, Vollmer W, Simorre JP.** 2014. Elongated structure of the outer-  
693 membrane activator of peptidoglycan synthesis LpoA: implications for PBP1A  
694 stimulation. *Structure* **22**:1047-1054.
- 695 49. **Nandi S, Swanson S, Tomberg J, Nicholas RA.** 2015. Diffusion of antibiotics  
696 through the PilQ secretin in *Neisseria gonorrhoeae* occurs through the immature,  
697 sodium dodecyl sulfate-labile form. *J Bacteriol* **197**:1308-1321.
- 698 50. **Demchick P, Koch AL.** 1996. The Permeability of the Wall Fabric of *Escherchia*  
699 *coli* and *Bacillus subtilis*. *J Bacteriol* **178**:768-773.
- 700 51. **Wang P, Robert L, Pelletier J, Dang WL, Taddei F, Wright A, Jun S.** 2010.  
701 Robust growth of *Escherichia coli*. *Curr Biol* **20**:1099-1103.
- 702 52. **Korotkov KV, Johnson TL, Jobling MG, Pruneda J, Pardon E, Heroux A,**  
703 **Turley S, Steyaert J, Holmes RK, Sandkvist M, Hol WG.** 2011. Structural and  
704 functional studies on the interaction of GspC and GspD in the type II secretion  
705 system. *PLoS Pathog* **7**:e1002228.
- 706 53. **Wang X, Pineau C, Gu S, Guschinskaya N, Pickersgill RW, Shevchik VE.**  
707 2012. Cysteine scanning mutagenesis and disulfide mapping analysis of

- 708 arrangement of GspC and GspD protomers within the type 2 secretion system. J  
709 Biol Chem **287**:19082-19093.
- 710 54. **Lamers RP, Nguyen UT, Nguyen Y, Buensuceso RN, Burrows LL.** 2015. Loss  
711 of membrane-bound lytic transglycosylases increases outer membrane  
712 permeability and beta-lactam sensitivity in *Pseudomonas aeruginosa*.  
713 Microbiologyopen **4**:879-895.
- 714 55. **Hoang TT, Karkhoff-Schweizer RR, Kutchma AJ, Schweizer HP.** 1998. A  
715 broad-host-range Flp-FRT recombination system for site-specific excision of  
716 chromosomally-located DNA sequences: application for isolation of unmarked  
717 *Pseudomonas aeruginosa* mutants. Gene **212**:77-86.
- 718 56. **Shu X, Shaner NC, Yarbrough CA, Tsien RY, Remington SJ.** 2006. Novel  
719 Chromophores and Buried Charges Control Color in mFruits. Biochemistry  
720 **45**:9639-9647.
- 721 57. **Lieberman JA, Petro CD, Thomas S, Yang A, Donnenberg MS.** 2015. Type IV  
722 pilus secretins have extracellular C termini. MBio **6**:e00322-15.
- 723 58. **Asikyan ML, Kus JV, Burrows LL.** 2008. Novel proteins that modulate type IV  
724 pilus retraction dynamics in *Pseudomonas aeruginosa*. Journal of Bacteriology  
725 **190**:7022-7034.
- 726 59. **Kus JV, Tullis E, Cvitkovitch DG, Burrows LL.** 2004. Significant differences in  
727 type IV pilin allele distribution among *Pseudomonas aeruginosa* isolates from  
728 cystic fibrosis (CF) versus non-CF patients. Microbiology **150**:1315-1326.
- 729 60. **Schindelin J, Arganda-Carreras I, Frise E, Kaynig V, Longair M, Pietzsch T,**  
730 **Preibisch S, Rueden C, Saalfeld S, Schmid B, Tinevez J-Y, White DJ,**



- 731           **Hartenstein V, Eliceiri K, Tomancak P, Cardona A.** 2012. Fiji: an open-source  
732           platform for biological-image analysis. *Nature Methods* **9**:676-682.
- 733   61.   **Simon R, Priefer U, Puhler A.** 1983. A Broad Host Range Mobilization System  
734           for in vivo Genetic Engineering: Transposon Mutagenesis in Gram Negative  
735           Bacteria. *Nature Biotechnology* **1**:784-791.
- 736   62.   **Takhar HK, Kemp K, Kim M, Howell PL, Burrows LL.** 2013. The platform  
737           protein is essential for type IV pilus biogenesis. *J Biol Chem* **288**:9721-9728.
- 738   63.   **Kus JV, Kelly J, Tessier L, Harvey H, Cvitkovitch DG, Burrows LL.** 2008.  
739           Modification of *Pseudomonas aeruginosa* Pa5196 Type IV Pilins at Multiple Sites  
740           with D-Araf by a Novel GT-C Family Arabinosyltransferase, TfpW. *Journal of*  
741           *Bacteriology* **190**:7464-7478.
- 742   64.   **Nguyen Y, Harvey H, Sugiman-Marangos S, Bell SD, Buensuceso RNC,**  
743           **Junop MS, Burrows LL.** 2015. Structural and Functional Studies of the  
744           *Pseudomonas aeruginosa* Minor Pilin, PilE. *Journal of Biological Chemistry*  
745           **290**:26856-26865.
- 746
- 747
- 748
- 749
- 750
- 751
- 752
- 753

754 **TABLES**

755 **Table 1. Bacterial strains and plasmids**

| Strain                      | Description                                                                                                                                                                                            | Source     |
|-----------------------------|--------------------------------------------------------------------------------------------------------------------------------------------------------------------------------------------------------|------------|
| <b><i>E. coli</i></b>       |                                                                                                                                                                                                        |            |
| DH5 $\alpha$                | F-, $\phi$ 80lacZ, M15, $\Delta(lacZYA-argF)$ , U169, <i>recA1</i> , <i>endA1</i> , <i>hsdR17(rk-,mk+)</i> , <i>phoA</i> <sup>supE44</sup> , <i>thi-1</i> , <i>gyrA96</i> , <i>relA1</i> , $\lambda$ - | Invitrogen |
| SM10                        | <i>thi-1</i> , <i>thr</i> , <i>leu</i> , <i>tonA</i> , <i>lacy</i> , <i>supE</i> , <i>recA</i> , RP4-2-Tcr::Mu, Kmr; mobilizes plasmids into <i>P. aeruginosa</i> via conjugation                      | (61)       |
| <b><i>P. aeruginosa</i></b> |                                                                                                                                                                                                        |            |
| PAK                         | Wild type                                                                                                                                                                                              | J. Boyd    |
| $\Delta pilM$               | Deletion of <i>pilM</i>                                                                                                                                                                                | (62)       |
| <i>pilP</i> ::FRT           | FRT scar at nucleotide 86 of <i>pilP</i>                                                                                                                                                               | (14)       |

|                                |                                                                                      |            |
|--------------------------------|--------------------------------------------------------------------------------------|------------|
| <i>pilQ</i> ::FRT              | FRT scar at nucleotide 571 of <i>pilQ</i>                                            | (9)        |
| <i>pilA</i> ::FRT              | FRT scar at SphI site within <i>pilA</i>                                             | (63)       |
| $\Delta pilF$                  | <i>pilF</i> deletion strain                                                          | This study |
| $\Delta minC$                  | <i>minC</i> deletion strain                                                          | This study |
| mCherry-PilO                   | In frame fusion of <i>mCherry</i> to the 5' end of <i>pilO</i> on the PAK chromosome | This study |
| $\Delta pocA$                  | <i>pocA</i> deletion strain                                                          | (29)       |
| $\Delta fimV$                  | <i>fimV</i> deletion strain                                                          | (39)       |
| <i>fimV</i> $\Delta$ LysM      | <i>fimV</i> with in frame deletion of LysM domain                                    | (28)       |
| mCherry-PilO $\Delta pilM$     | deletion of <i>pilM</i> in mCherry-PilO strain                                       | This study |
| mCherry-PilO <i>pilP</i> ::FRT | FRT scar in <i>pilP</i> at nucleotide 86 in mCherry-PilO strain                      | This study |
| mCherry-PilO <i>pilQ</i> ::FRT | FRT scar at position 571 within <i>pilQ</i> in mCherry-PilO strain                   | This study |
| mCherry-PilO $\Delta pilF$     | deletion of <i>pilF</i> in                                                           | This study |

|                                        |                                                                                                              |               |
|----------------------------------------|--------------------------------------------------------------------------------------------------------------|---------------|
|                                        | mCherry-PilO strain                                                                                          |               |
| mCherry-PilO $\Delta minC$             | deletion of <i>minC</i> in mCherry-PilO strain                                                               | This study    |
| mCherry-PilO $\Delta pocA$             | deletion of <i>pocA</i> in mCherry-PilO background                                                           | This study    |
| mCherry-PilO $\Delta fimV$             | deletion of <i>fimV</i> in mCherry-PilO background                                                           | This study    |
| mCherry-PilO <i>fimV</i> $\Delta$ LysM | Insertion of <i>mCherry</i> at the 5' end of <i>pilO</i> with <i>fimV</i> containing deletion of LysM domain | This study    |
|                                        |                                                                                                              |               |
| <b>Plasmids</b>                        | <b>Description</b>                                                                                           | <b>Source</b> |
| pEX18Gm                                | Suicide vector used for gene replacement, Gm                                                                 | (55)          |
| pEX18Ap                                | Suicide vector used for gene replacement, Ap                                                                 | (55)          |
| pBADGr                                 | Arabinose inducible protein expression vector                                                                | (58)          |
| pFLP2                                  | Suicide vector containing                                                                                    | (55)          |

|                               |                                                                                                      |            |
|-------------------------------|------------------------------------------------------------------------------------------------------|------------|
|                               | Flp recombinase                                                                                      |            |
| pEX18Gm:: <i>mCherry-pilO</i> | Suicide vector containing <i>mCherry-pilO</i> , subcloned from pUC57 (Genscript) using EcoRI/HindIII | This study |
| pEX18Gm:: <i>ΔpilF</i>        | Suicide vector containing <i>pilF</i> deletion, cloned using BamHI/HindIII                           | This study |
| pEX18Gm:: <i>ΔminC</i>        | Suicide vector containing <i>minC</i> deletion, cloned using BamHI/HindIII                           | This study |
| pEX18Gm:: <i>ΔpocA</i>        | Suicide vector containing <i>pocA</i> deletion, cloned using EcoRI/XbaI                              | This study |
| pEX18Ap- <i>pilQ</i> ::GmFRT  | Suicide vector containing PAK <i>pilQ</i> disrupted with FRT-flanked Gm cassette at position 571     | This study |
| pBADGr:: <i>pilQ-mCherry</i>  | <i>pilQ-mCherry</i> complementation construct, cloned using EcoRI/HindIII                            | This study |
| pBADGr:: <i>pilF</i>          | <i>pilF</i> complementation                                                                          | This study |

|                                           |                                                                                                 |            |
|-------------------------------------------|-------------------------------------------------------------------------------------------------|------------|
|                                           | construct, cloned using<br>SphI/HindIII                                                         |            |
| pBADGr:: <i>pilQ</i>                      | <i>pilQ</i> complementation<br>construct, cloned using<br>EcoRI/HindIII                         | This study |
| pBADGr:: <i>pilQ</i> $\Delta$ <i>AMIN</i> | <i>pilQ</i> $\Delta$ <i>AMIN</i><br>complementation<br>construct, cloned using<br>EcoRI/HindIII | This study |
| pBADGr:: <i>pocA</i>                      | <i>pocA</i> complementation<br>construct, cloned using<br>EcoRI/HindIII                         | This study |
| pBADGr:: <i>fimV-yfp</i>                  | <i>fimV-yfp</i><br>complementation<br>construct, cloned using<br>KpnI/XbaI                      | This study |

756

757

758

759 **Table 2. Primer sequences**

| <b>Name</b>    | <b>Oligonucleotide sequence</b>        |
|----------------|----------------------------------------|
| PilF-Fwd       | 5'ACGCCTTGCAAGATCAACCTGATTCCG3'        |
| PilF-Rev       | 5'TCGAACGCGCCGTTTTCCAGCTGACGC3'        |
| PilF mid-Rev   | 5'GGCCGGTTTCTTCATTTGCAGCG3'            |
| PilF Clone-Fwd | 5'TCATGCATGCATGACTGTACGCGCCGCGCTGG3'   |
| PilF Clone-Rev | 5'TCATAAGCTTTCATTTTTCCGCCTGGAATTCCTG3' |
| MinC Fwd       | 5'GGATACGGCAACTGCACCACCAGCCAG3'        |
| MinC Rev       | 5'GACGACGTTGACGAAGTCGTACACCAC3'        |
| MinC mid-Rev   | 5'CGTGGCGGCGACAGACCTCGAGGA3'           |
| PilN 3'-Fwd    | 5'GCCAACGTGTTCCAACCTG3'                |
| PilO Rev       | 5'CCACGCTGATCTGGATCG3'                 |
| PocA Fwd       | 5'GAATTCGGGGATATGCCACGTGTGGGA3'        |
| PocA Rev       | 5'AAGCTTTGCGGCGGAATTTACGCTTTGC3'       |
| PocA Mid-Rev   | 5'GAGGATCTCTCCAGCGG3'                  |
| PocA Clone-Fwd | 5'TCATGAATTCGTGTGGGAACCTGGTTCAAGCCGG3' |

|                  |                                                      |
|------------------|------------------------------------------------------|
| PocA Clone-Rev   | 5'TCATAAGCTTTACGCTTTGCCTTCCTCGACGTAG3'               |
| PilQ Clone-Fwd   | 5'AGAATTCCAACAGCAGTCTGTACAA3'                        |
| PilQ Clone-Rev   | 5'TCATAAGCTTTACGCGACCGATTGCGATGGCCTG3'               |
| PilQ 910-Fwd     | 5'CGACCTGAATCTGGTGGC3'                               |
| PilQ FRT-Chk Fwd | 5'TTGATCATCAACCTGACCGCGCTGTCCG3'                     |
| PilQ FRT-Chk Rev | 5'TCATCGGCTTGATGCTGACGGTCAGG3'                       |
| pBAD mcs-Fwd     | 5'AAGTGTCTATAATCACGGCAGA3'                           |
| pBAD mcs-Rev     | 5'TCACTTCTGAGTTCGGCATGG3'                            |
| mCherry Rev      | 5'TCATGCATGCGCTTCCGCCGCTTTGTACAGCTCGTC<br>CATGCCGC3' |
| PilQ 5' Rev      | 5'TCATTCTAGAGTCCGCGGCGAGCAATGCCGGCGC3'               |
| PilQ N0 Fwd      | 5'TCATTCTAGAGGCGAGAACTGTCGCTGAACTTC3'                |
| FimV Clone Fwd   | 5'GCGGGTACCATGGTTCGGCTTCG3'                          |
| FimV Clone Rev   | 5'GCGTCTAGAGGCCAGGCGCTCCA3'                          |

760

761



762 **FIGURE LEGENDS**

763 **Figure 1. mCherry-PilO localizes to cell poles and future sites of cell division in *P.***

764 ***aeruginosa*. A.** Map of the T4aP alignment subcomplex operon showing *mCherry-pilO*

765 integration. **B.** The mCherry-PilO fusion was stable (~48 kDa product recognized by

766 both anti-PilO and anti-mCherry antibodies; a plasmid-encoded PilE-mCherry fusion –

767 open triangle – was used as a positive control for the latter; (64)) and functional for

768 twitching motility. **C.** mCherry-PilO localized to the poles of wild type cells and to the

769 septum in late-stage dividing cells. **D.** When cells were filamented using 40 µg/ml

770 cefsulodin, mCherry-PilO localized to the poles and at regularly spaced foci

771 (arrowheads). Scale bar = 3 µm. **E.** mCherry pixel intensity in 50 untreated cells after

772 normalization of length to 1 as described in the Methods.

773

774 **Figure 2. mCherry-PilO localizes to aberrantly localized septa in a *minC* mutant.**

775 **A.** Transmission electron micrograph of a *minC* mutant of *P. aeruginosa* strain PAK. In

776 the absence of *minC*, cells have aberrantly located division sites (red arrows). Scale bar

777 = 1 µm. **B.** mCherry-PilO polar foci are indicated with white arrowheads while foci

778 localized to aberrantly placed septa are indicated with yellow arrows.

779

780 **Figure 3. Polar localization of T4aP alignment subcomplex requires PilQ.** In the

781 absence of PilM, mCherry-PilO is localized to **A.** poles and septa in untreated cells, and

782 **B.** poles and regularly spaced foci in cells treated with cefsulodin. In the absence of

783 PilQ, mCherry-PilO is delocalized in both **C.** untreated and **D.** antibiotic-filamented cells.

784 Similarly, in the absence of PilP, mCherry-PilO is delocalized in **E.** untreated and **F.**

785 antibiotic-treated cells. The last 3 panels show quantification of mCherry pixel intensity  
786 in the absence of **G.** *pilM*, **H.** *pilQ*, or **I.** *pilP*, in 50 untreated cells after normalization of  
787 length to 1 as described in the Methods. Scale bar = 3  $\mu$ m.

788

789 **Figure 4. The AMIN domains of PilQ are required for polar localization of mCherry-**

790 **PilO. A.** Domain map of PilQ showing its PG-binding AMIN domains in blue.

791 Complementation of a *pilQ* rmutant expressing mCherry-PilO with full length *pilQ* re-  
792 established its polar and septal localization (white arrowheads) in **B.** untreated cells, and  
793 **C.** localization to the poles and regularly spaced foci in cefsulodin treated cells. When  
794 the same mutant was complemented with a truncated version of *pilQ* that encodes only  
795 N0-N1 and the secretin domains, mCherry-PilO was delocalized in both **D.** untreated  
796 and **E.** antibiotic-treated cells. The last 3 panels show quantification of mCherry pixel  
797 intensity in the presence of **F.** PilQ or **G.** PilQ lacking its AMIN domains, in 50 untreated  
798 cells after normalization of length to 1 as described in the Methods. Scale bar = 3  $\mu$ m.

799

800 **Figure 5. mCherry-PilO is polarly localized in the absence of *pilF*. A.** mCherry-PilO

801 localized to the poles and septa of late-stage dividing cells, marked by white

802 arrowheads. **B.** When cells were filamented with cefsulodin, mCherry-PilO localized to  
803 the poles and to foci (arrows). Scale bar = 3  $\mu$ m. Panel **C.** shows quantification of

804 mCherry pixel intensity in the *pilF* background, in 50 untreated cells after normalization  
805 of length to 1 as described in the Methods.

806

807 **Figure 6. FimV is required for polar localization of mCherry-PilO.** In the absence of

808 FimV, mCherry-PilO was delocalized in **A.** untreated cells and **B.** cells treated with  
809 cefsulodin. In cells expressing a version of FimV with an in-frame deletion of its PG-  
810 binding domain (LysM), mCherry-PilO was delocalized in **C.** untreated and **D.** antibiotic-  
811 treated cells. The last two panels show quantification of mCherry pixel intensity **F.** in the  
812 absence of FimV or **G.** in the strain expressing FimV<sub>ΔLysM</sub>, in 50 untreated cells after  
813 normalization of length to 1 as described in the Methods. Scale Bar = 3 μm.

814  
815 **Figure 7. mCherry-PilO is delocalized in a *pocA* mutant.** In the absence of the polar  
816 organelle coordinating protein, PocA, mCherry-PilO was delocalized in **A.** untreated  
817 cells and **B.** cells treated with cefsulodin. When *pocA* was reintroduced *in trans*,  
818 mCherry-PilO localization to the poles and septum was recovered (white arrowheads) in  
819 **C.** untreated cells, as well as to **D.** the poles and regularly spaced foci in antibiotic-  
820 treated cells. The last two panels show quantification of mCherry pixel intensity **E.** in the  
821 absence of PocA and **F.** in the *pocA*-complemented mutant, in 50 untreated cells after  
822 normalization of length to 1 as described in the Methods. Scale bar = 3 μm.

823  
824 **Figure 8. FimV remains polarly localized in the absence of PocA.** **A.** FimV-YFP  
825 remained localized to the cell poles (arrowheads) in a *pocA* mutant. **B.** FimV-YFP  
826 localized to the poles in cefsulodin treated cells. Scale bar = 3 μm.

827

828

## Carter et al. Figure 1

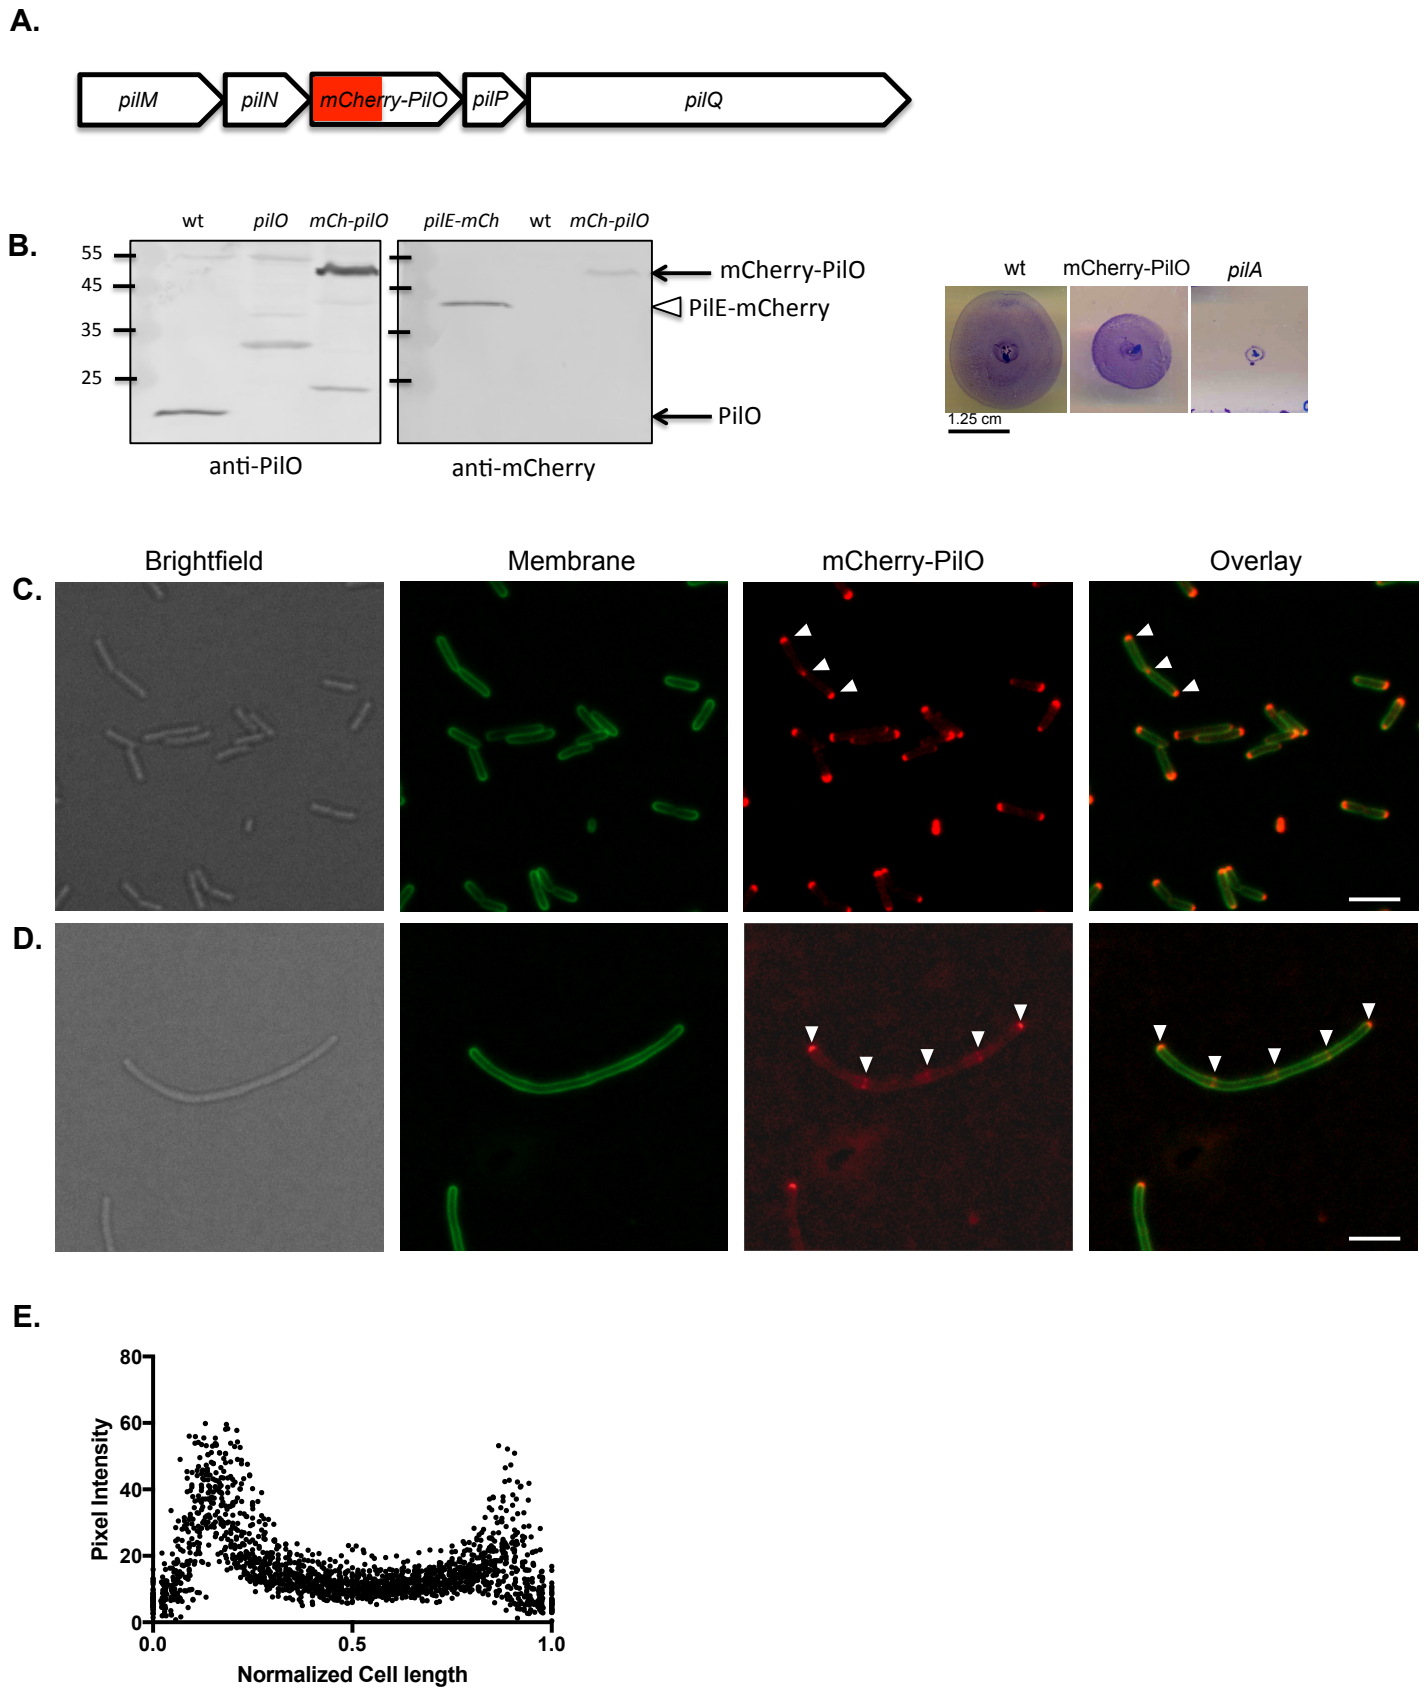

## Carter et al. Figure 2

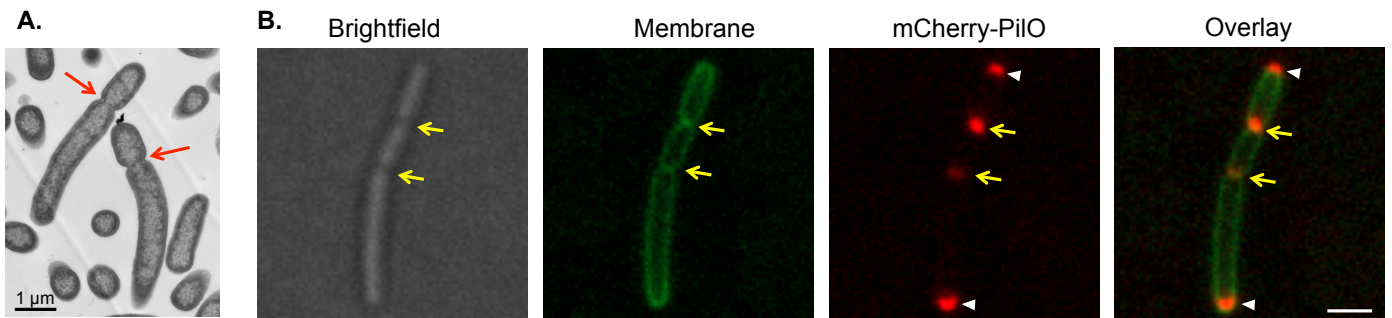



### Carter et al. Figure 3

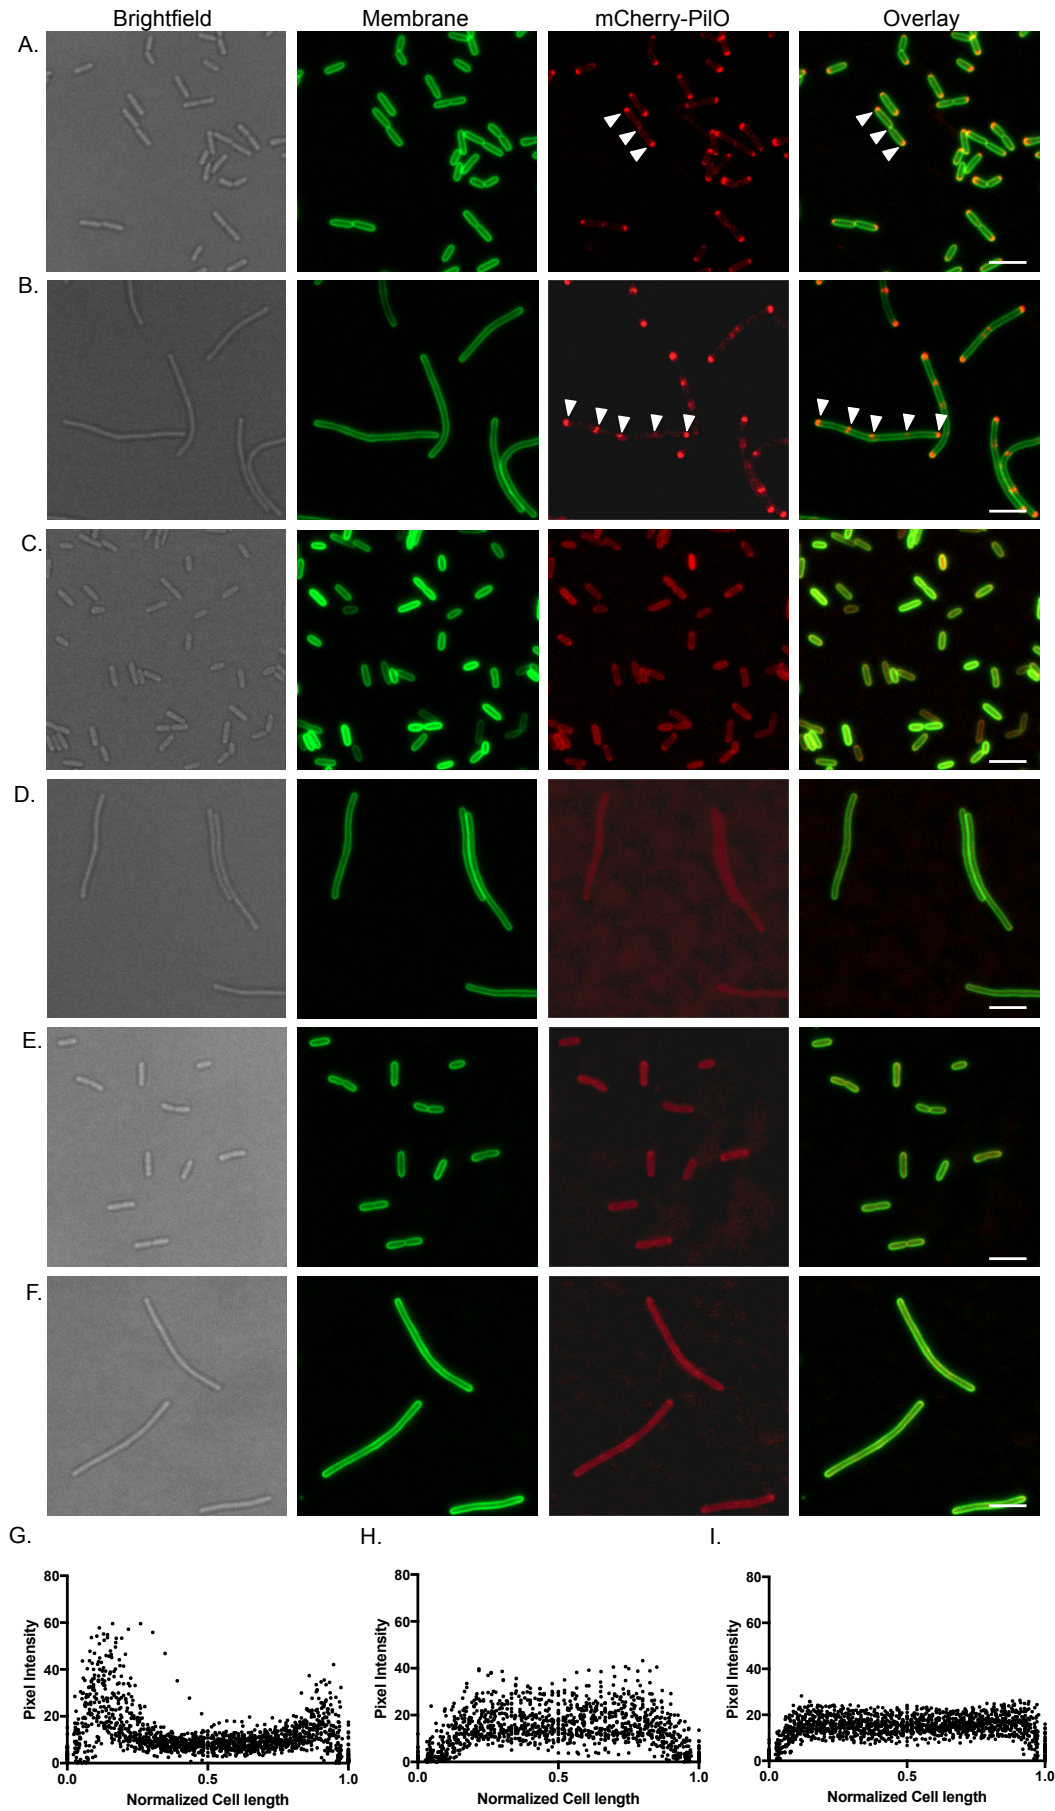

## Carter et al. Figure 5

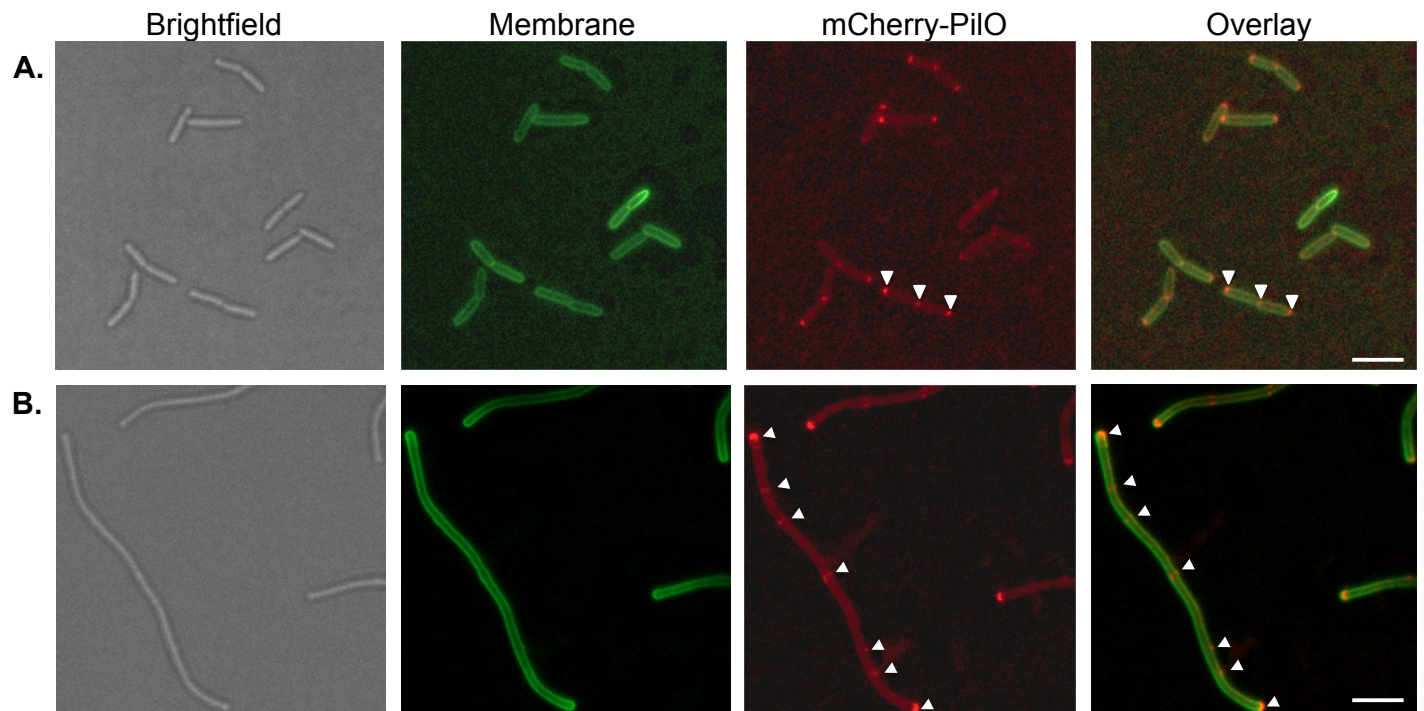

**C.**

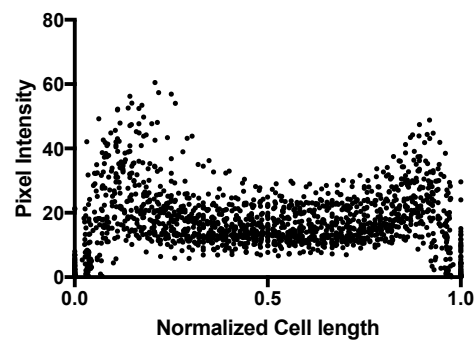



## Carter et al. Figure 6

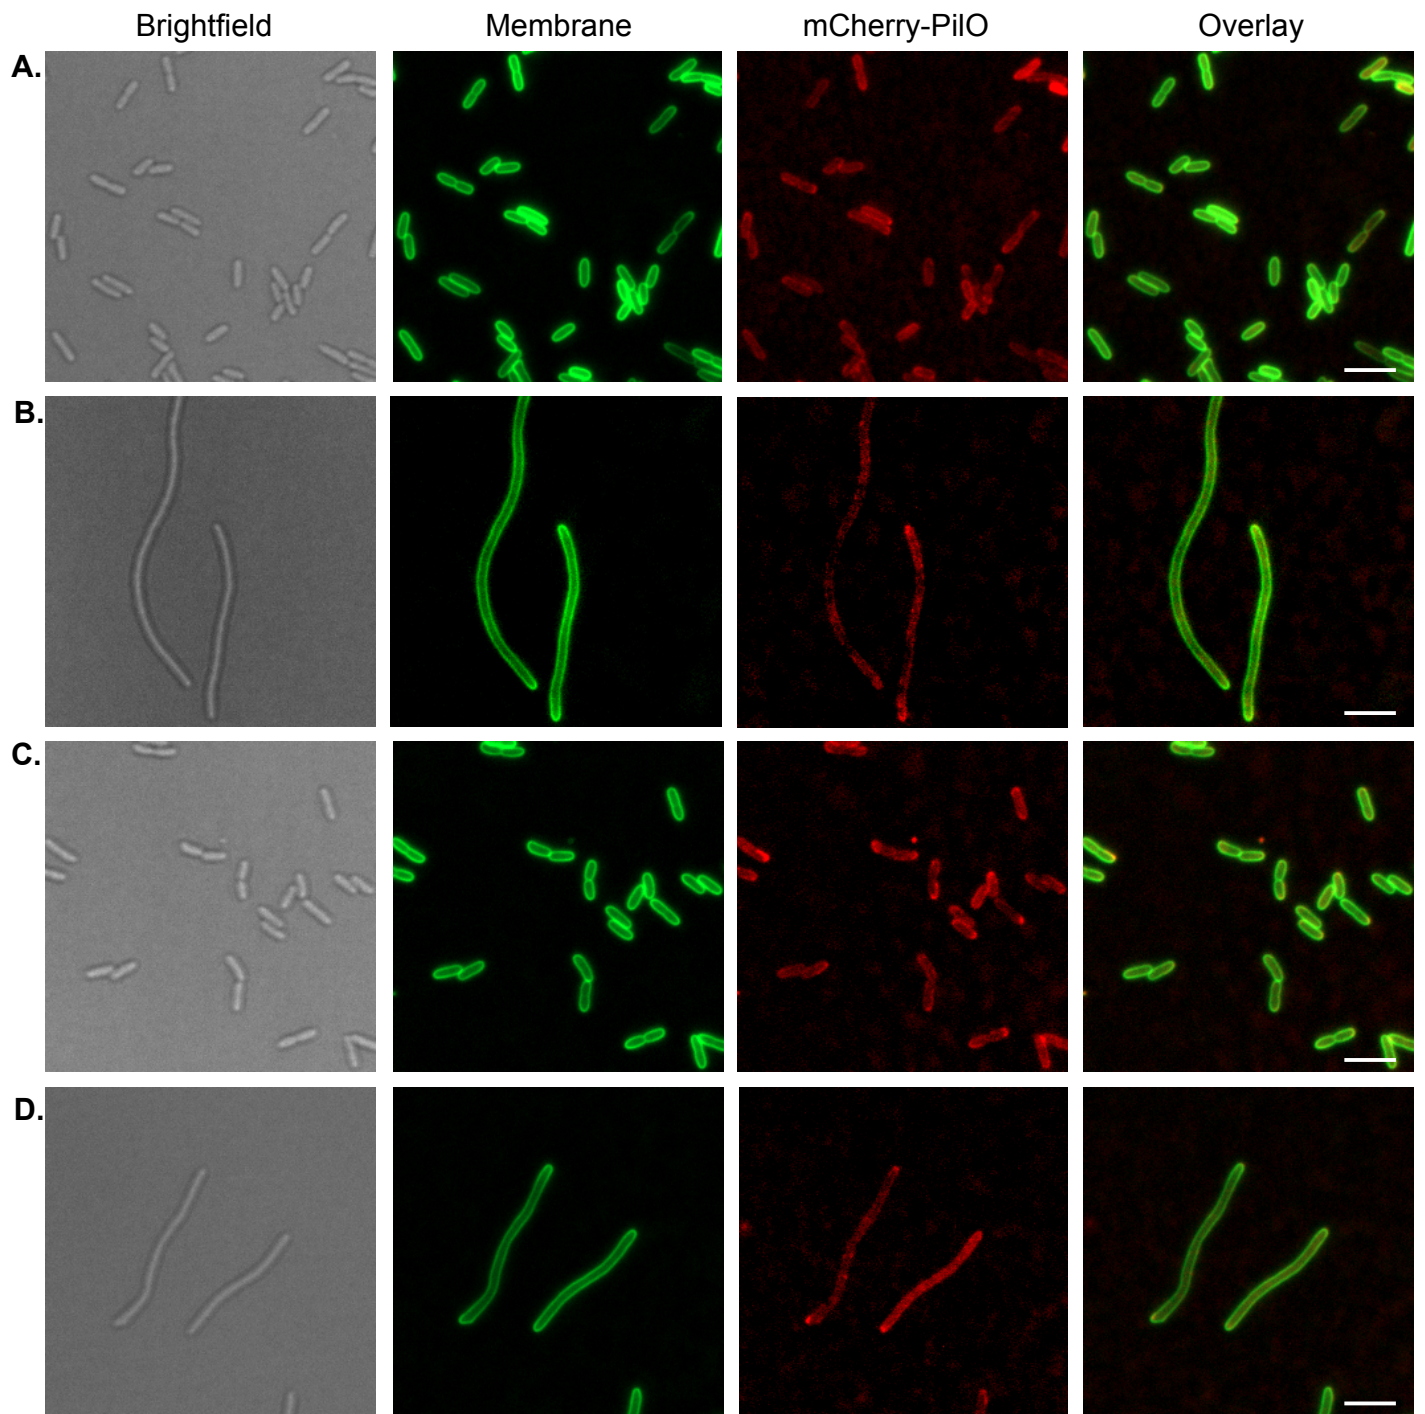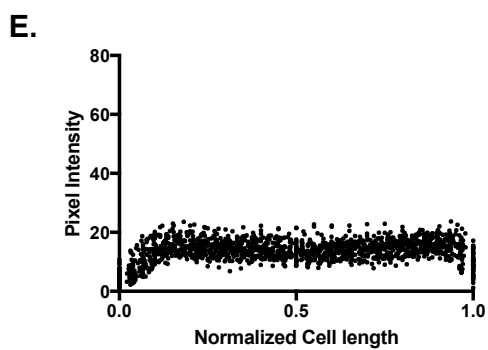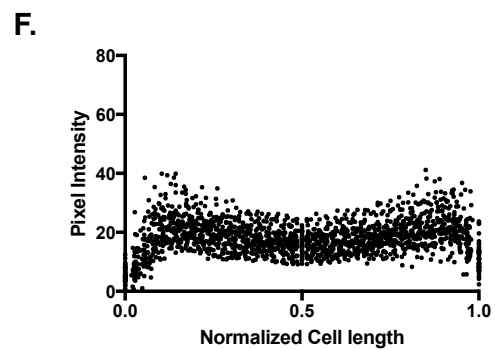



## Carter et al. Figure 4

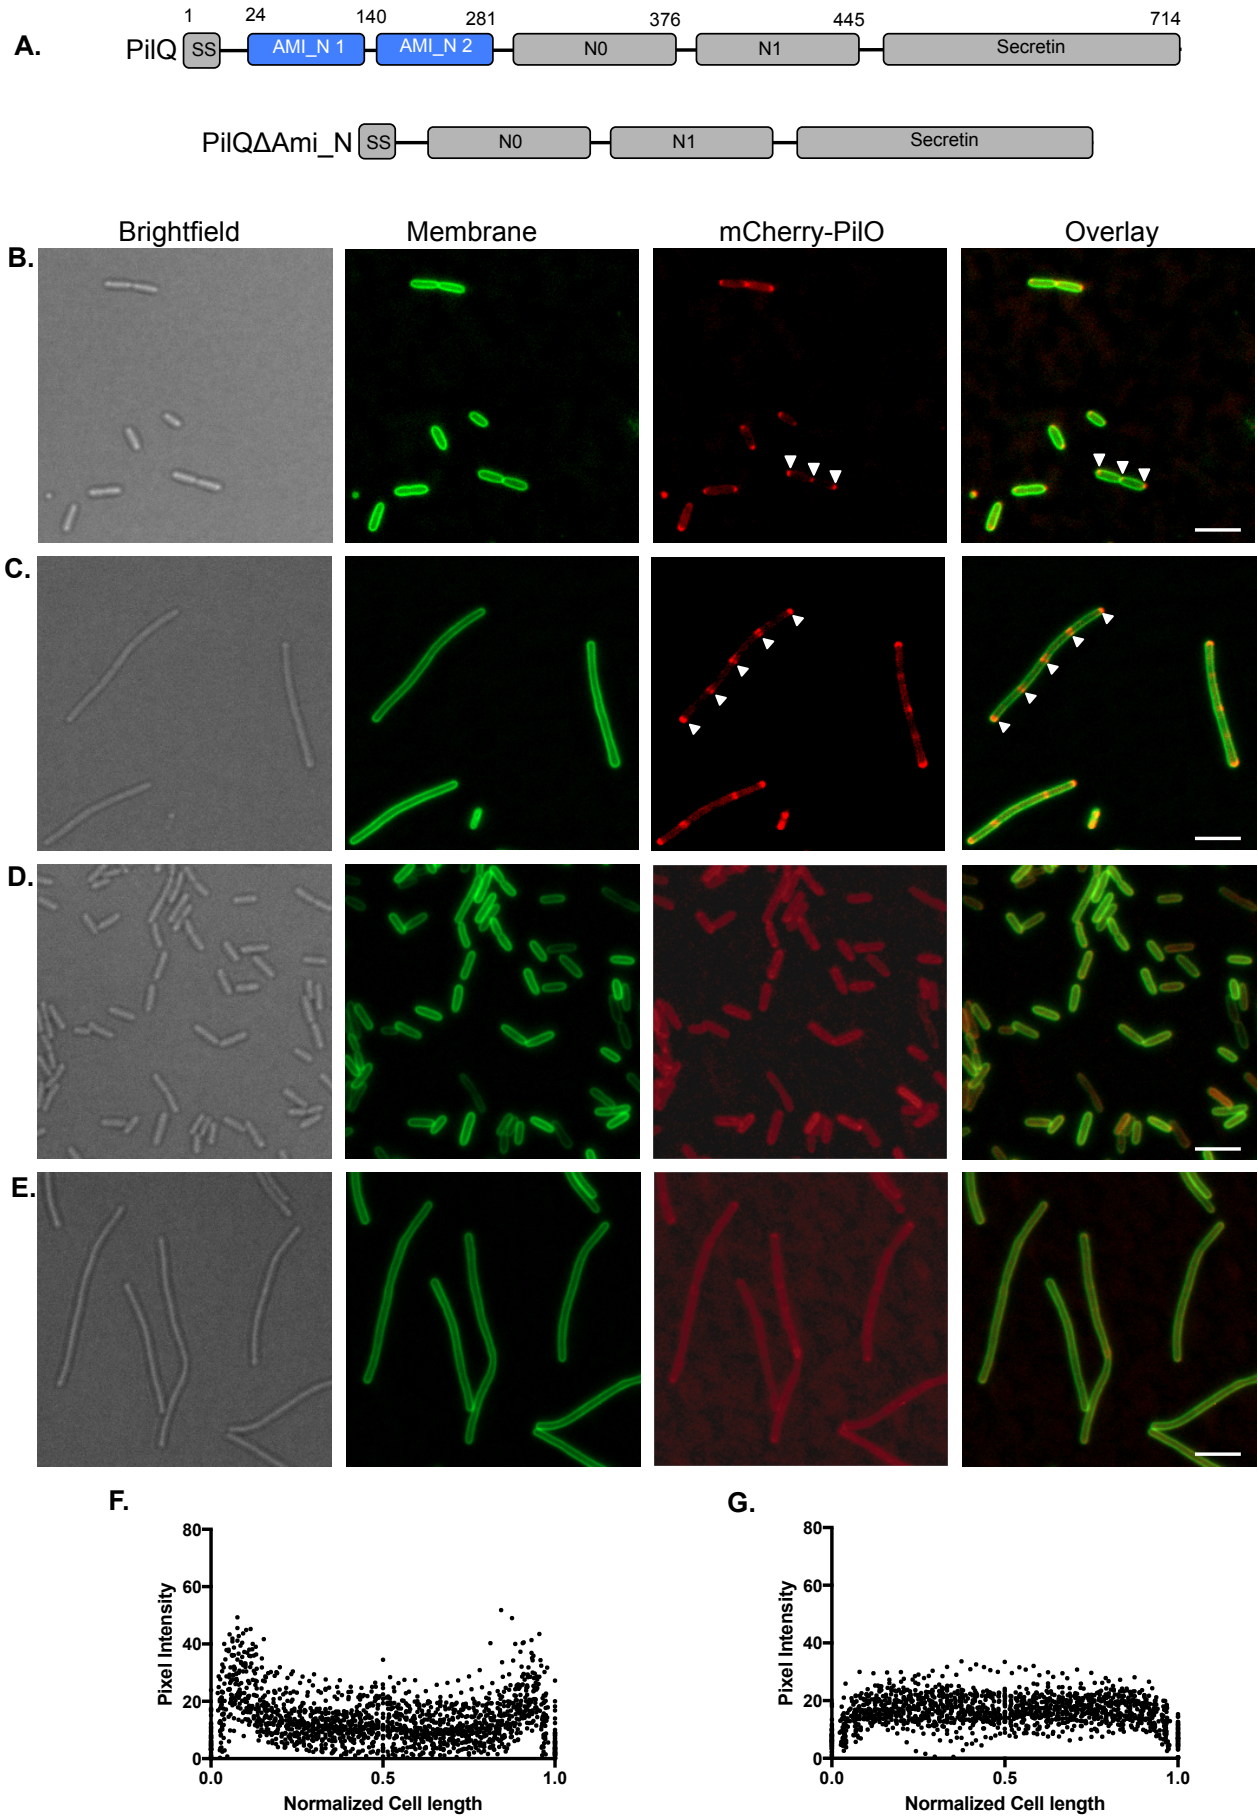

## Carter et al. Figure 7

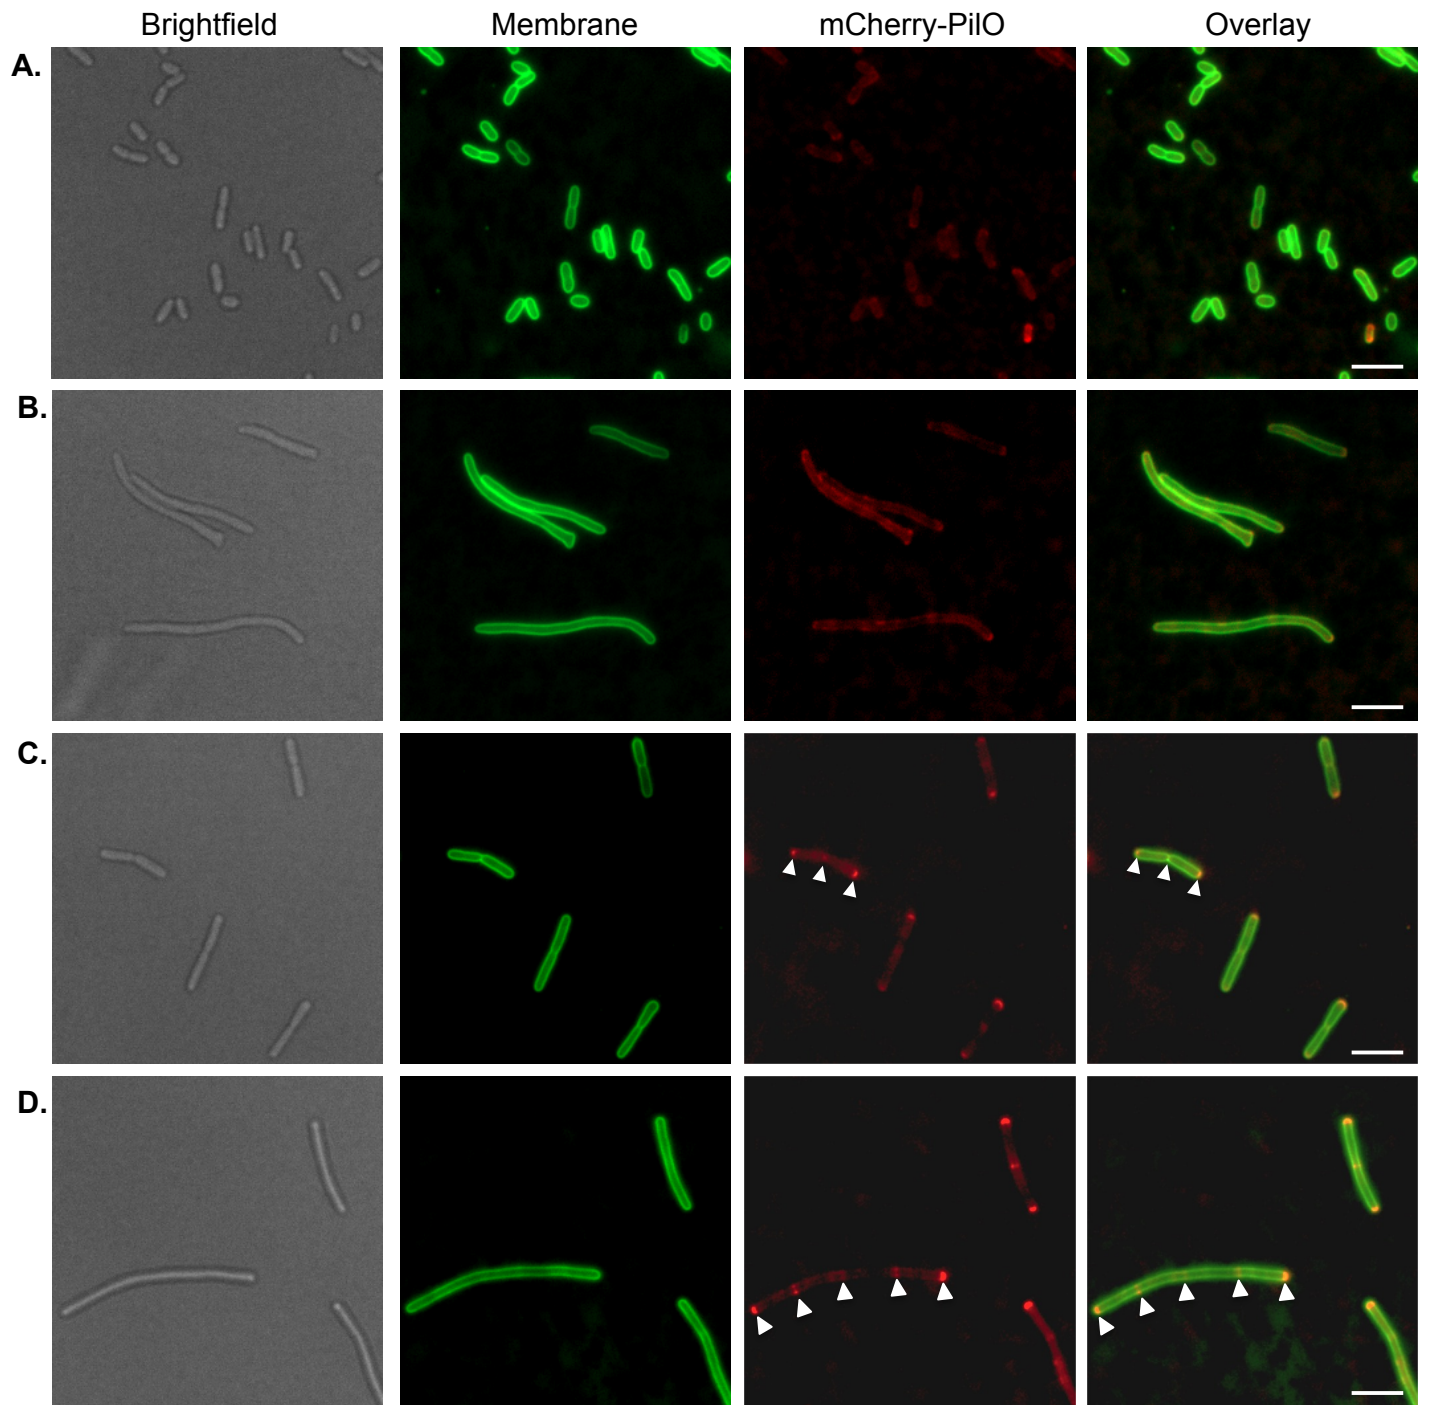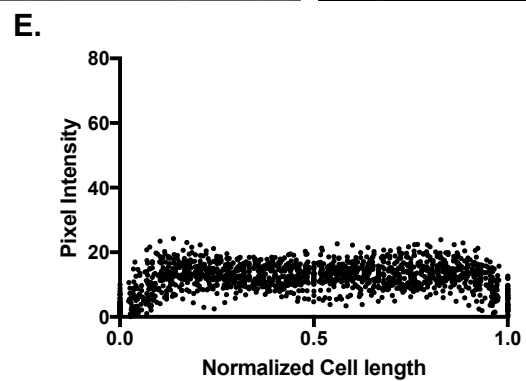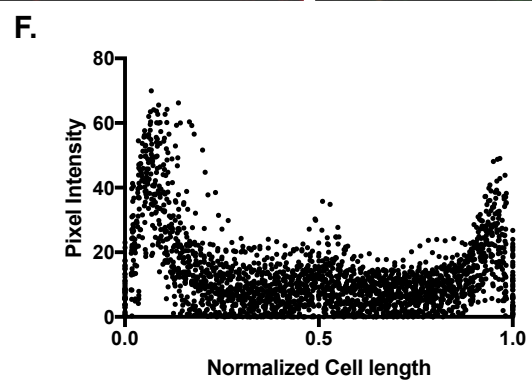

## Carter et al. Figure 8

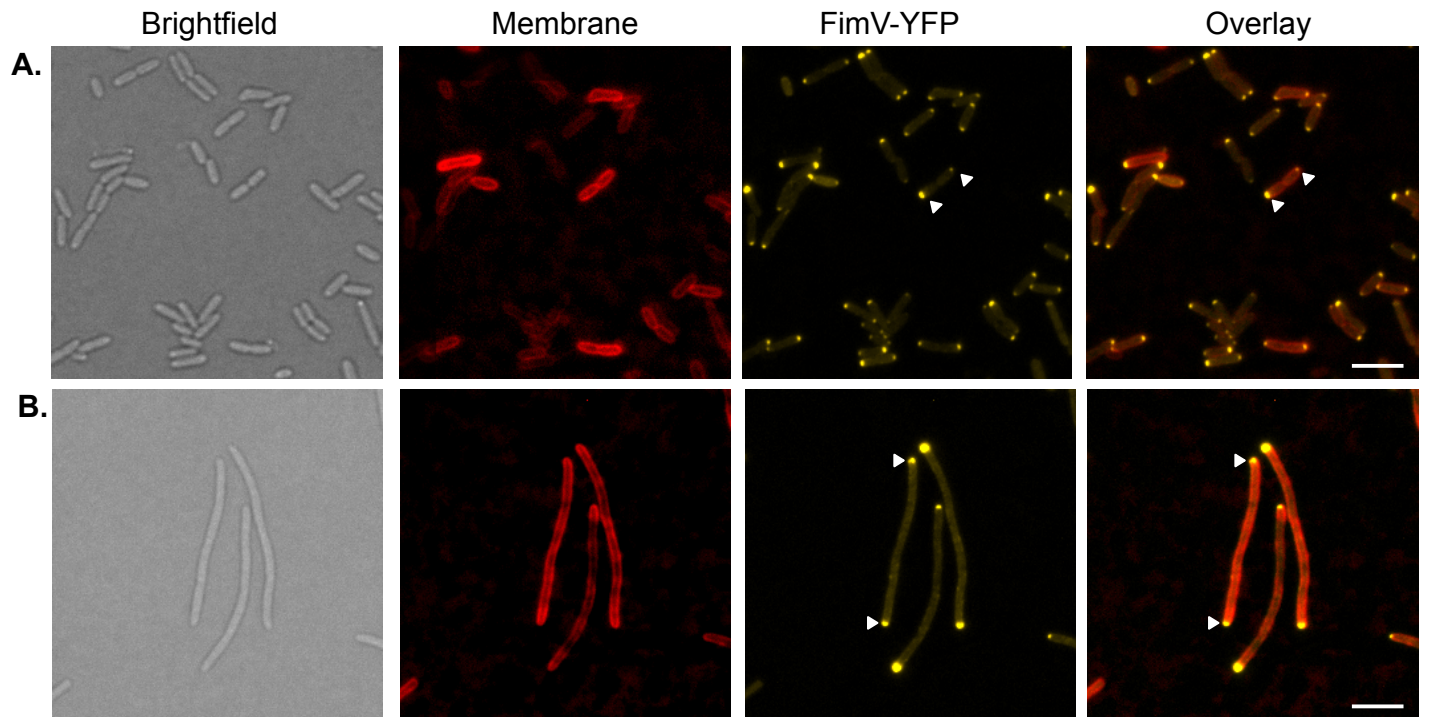

Source: https://www.biorxiv.org/content/biorxiv/early/2016/11/23/087965.full.pdf
